# Supplementary material for: Manganese-catalyzed regiospecific sp3C–S bond formation through C–C bond cleavage of cyclobutanols
Source: Royal Society of Chemistry journal article supplement (doi:10.1039/c6cc01843b), 2016-01-01

## Supporting Information

### **Manganese-Catalyzed Regiospecific $sp^3$ C-S Bond Formation through C-C Bond Cleavage of Cyclobutanols**

Rongguo Ren,<sup>†</sup> Zhen Wu,<sup>†</sup> and Chen Zhu<sup>\*,†,‡</sup>

<sup>†</sup> Key Laboratory of Organic Synthesis of Jiangsu Province, College of Chemistry, Chemical Engineering and Materials Science, Soochow University, 199 Ren-Ai Road, Suzhou, Jiangsu 215123, China

<sup>‡</sup> Key Laboratory of Synthetic Chemistry of Natural Substances, Shanghai Institute of Organic Chemistry, Chinese Academy of Sciences, 345 Lingling Road, Shanghai 200032, China

Email: [chzhu@suda.edu.cn](mailto:chzhu@suda.edu.cn)

### **Table of Contents**

|                                                                                 |     |
|---------------------------------------------------------------------------------|-----|
| 1. General experimental details                                                 | S2  |
| 2. General procedure for the synthesis of thioethers                            | S2  |
| 3. Characterization of products                                                 | S2  |
| 4. <sup>1</sup> H, <sup>13</sup> C, and <sup>19</sup> F NMR spectra of products | S10 |

## 1. General experimental details

All reactions were maintained under a nitrogen atmosphere unless otherwise stated. Commercially available reagents were used without further purification. Infrared (FT-IR) spectra were recorded on a BRUKER VERTEX 70,  $\nu_{\max}$  in  $\text{cm}^{-1}$ .  $^1\text{H-NMR}$  spectra were recorded on a BRUKER AVANCE III HD (400 MHz) spectrometer. Chemical shifts are reported in ppm from tetramethylsilane with the solvent resonance as internal standard ( $\text{CDCl}_3$ :  $\delta$  7.26). Data are reported as follows: chemical shift, multiplicity (s = singlet, d = doublet, t = triplet, q = quadruplet, br = broad, m = multiplet), coupling constants (Hz) and integration.  $^{13}\text{C-NMR}$  spectra were recorded on a BRUKER AVANCE III HD (100 MHz) spectrometer with complete proton decoupling. Chemical shifts are reported in ppm from tetramethylsilane with the solvent resonance as the internal standard ( $\text{CDCl}_3$ :  $\delta$  77.16).  $^{19}\text{F-NMR}$  spectra were recorded on a BRUKER AVANCE III HD (376 MHz) spectrometer. Mass spectra were measured with an Agilent Technologies 6120 Quadrupole LC/MS. High resolution mass spectrometry (HRMS) were measured with a GCT Premier<sup>TM</sup> and BRUKER micrOTF-Q III. Melting points were measured using INESA WRR and values are uncorrected.

Tertiary cyclobutanols were prepared by the addition of Grignard reagent to the corresponding cyclobutanones according to the reported procedures.<sup>1</sup>

## 2. General procedure for the synthesis of thioethers

Cyclobutanol **1** (0.2 mmol, 1.0 equiv),  $\text{Mn}(\text{OAc})_3 \cdot 2\text{H}_2\text{O}$  (0.04 mmol, 0.2 equiv), Bipy (0.044 mmol, 0.22 equiv),  $\text{ArSSAr}$  (0.6 mmol, 3.0 equiv) and BI-OH (0.6 mmol, 3.0 equiv) were loaded in a flask which was subjected to evacuation/flushing with nitrogen three times.  $\text{CH}_3\text{CN}$  (1.5 mL) was added to the mixture via syringe and the mixture was then stirred at 25 °C for about 1 h. Subsequently, the reaction which was allowed for stirring at 70 °C until the starting material had been consumed as determined by TLC. The reaction mixture was extracted with EtOAc (3 × 10 mL). The combined organic layers were washed by brine, dried over  $\text{Na}_2\text{SO}_4$ , filtered, concentrated, and purified by flash chromatography on silica gel (ethyl acetate/petroleum ether) to give the product **2**.

## 3. Characterization of products

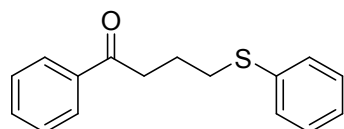

**2a**: yellow solid, m.p. 36-37 °C.  $^1\text{H NMR}$  (400 MHz,  $\text{CDCl}_3$ )  $\delta$  7.96-7.92 (m, 2H), 7.58-7.53 (m, 1H), 7.48-7.42 (m, 2H), 7.37-7.33 (m, 2H), 7.30-7.25 (m, 2H), 7.19-7.14 (m, 1H), 3.14 (t,  $J$  = 7.2 Hz, 2H), 3.04 (t,  $J$  = 7.2 Hz, 2H), 2.13-2.06 (m, 2H);  $^{13}\text{C NMR}$  (100 MHz,  $\text{CDCl}_3$ )  $\delta$  199.0, 136.4, 135.7, 132.6, 128.8, 128.5, 128.1, 127.6, 125.5, 36.5, 32.6, 23.0. FT-IR:  $\nu$  ( $\text{cm}^{-1}$ ) 3050, 2954, 2917, 1676, 1595, 1470, 1448, 1368, 1191. HRMS [ESI]  $m/z$  257.1000, found 257.1001.

<sup>1</sup> (a) B. M. Casey, C. A. Eakin and R. A. Flowers, II, *Tetrahedron Lett.*, **2009**, 50, 1264-1266; (b) H.-J. Xu, F.-F. Zhu, Y.-Y. Shen, X. Wan and Y.-S. Feng, *Tetrahedron*, **2012**, 68, 4145-4151; (c) D. Rosa, A. Chtchemelinine and A. Orellana, *Synthesis*, **2012**, 12, 1885-1891.

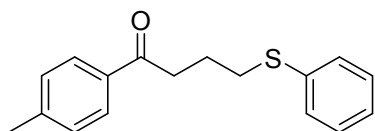

**2b:** yellow solid, m.p. 46-47 °C.  $^1\text{H}$  NMR (400 MHz,  $\text{CDCl}_3$ )  $\delta$  7.84 (d,  $J = 8.4$  Hz, 2H), 7.37-7.33 (m, 2H), 7.29-7.23 (m, 4H), 7.18-7.14 (m, 1H), 3.11 (t,  $J = 7.2$  Hz, 2H), 3.03 (t,  $J = 7.2$  Hz, 2H), 2.40 (s, 3H), 2.12-2.04 (m, 2H);  $^{13}\text{C}$  NMR (100 MHz,  $\text{CDCl}_3$ )  $\delta$  198.6, 143.4, 135.7, 133.9, 128.8, 128.7, 128.5, 127.7, 125.5, 36.4, 32.7, 23.1, 21.2. FT-IR:  $\nu$  ( $\text{cm}^{-1}$ ) 3061, 2918, 2850, 1670, 1605, 1478, 1307, 1230, 1180. HRMS [ESI] calcd for  $\text{C}_{17}\text{H}_{19}\text{OS}$   $[\text{M}+\text{H}]^+$  271.1157, found 271.1153.

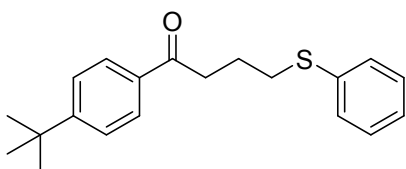

**2c:** yellow solid, m.p. 55-56 °C.  $^1\text{H}$  NMR (400 MHz,  $\text{CDCl}_3$ )  $\delta$  7.89 (d,  $J = 8.4$  Hz, 2H), 7.46 (d,  $J = 8.4$  Hz, 2H), 7.37-7.33 (m, 2H), 7.27 (dd,  $J = 8.0, 7.2$  Hz, 2H), 7.19-7.13 (m, 1H), 3.12 (t,  $J = 7.2$  Hz, 2H), 3.03 (t,  $J = 7.2$  Hz, 2H), 2.12-2.04 (m, 2H), 1.34 (s, 9H);  $^{13}\text{C}$  NMR (100 MHz,  $\text{CDCl}_3$ )  $\delta$  198.6, 156.3, 135.7, 133.8, 128.7, 128.5, 127.5, 125.5, 125.1, 36.4, 34.6, 32.7, 30.6, 23.1. FT-IR:  $\nu$  ( $\text{cm}^{-1}$ ) 3061, 2958, 2850, 1676, 1603, 1584, 1479, 1190, 1107. HRMS [ESI] calcd for  $\text{C}_{20}\text{H}_{24}\text{OSNa}$   $[\text{M}+\text{Na}]^+$  335.1446, found 335.1430.

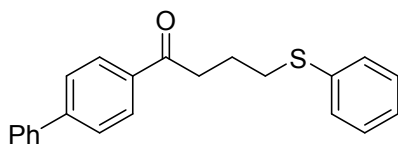

**2d:** white solid, m.p. 73-75 °C.  $^1\text{H}$  NMR (400 MHz,  $\text{CDCl}_3$ )  $\delta$  8.03-7.99 (m, 2H), 7.69-7.65 (m, 2H), 7.64-7.60 (m, 2H), 7.50-7.44 (m, 2H), 7.42-7.34 (m, 3H), 7.30-7.25 (m, 2H), 7.19-7.14 (m, 1H), 3.17 (t,  $J = 7.2$  Hz, 2H), 3.06 (t,  $J = 7.2$  Hz, 2H), 2.16-2.08 (m, 2H);  $^{13}\text{C}$  NMR (100 MHz,  $\text{CDCl}_3$ )  $\delta$  198.5, 145.3, 139.4, 135.7, 135.1, 128.8, 128.5, 128.5, 128.2, 127.8, 126.8, 126.8, 125.5, 36.5, 32.7, 23.0. FT-IR:  $\nu$  ( $\text{cm}^{-1}$ ) 3052, 2920, 2850, 1663, 1602, 1480, 1260, 1190. HRMS [ESI] calcd for  $\text{C}_{22}\text{H}_{21}\text{OS}$   $[\text{M}+\text{H}]^+$  333.1313, found 333.1316.

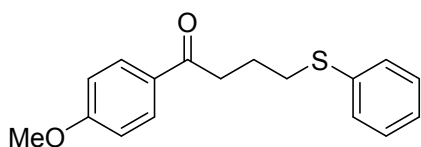

**2e:** yellow solid, m.p. 44-46 °C.  $^1\text{H}$  NMR (400 MHz,  $\text{CDCl}_3$ )  $\delta$  7.95-7.90 (m, 2H), 7.37-7.33 (m, 2H), 7.30-7.25 (m, 2H), 7.19-7.14 (m, 1H), 6.94-6.90 (m, 2H), 3.87 (s, 3H), 3.09 (t,  $J = 7.2$  Hz, 2H), 3.04 (t,  $J = 7.2$  Hz, 2H), 2.12-2.04 (m, 2H);  $^{13}\text{C}$  NMR (100 MHz,  $\text{CDCl}_3$ )  $\delta$  197.5, 163.0, 135.7, 129.8, 129.5, 128.7, 128.4, 125.5, 113.2, 55.0, 36.1, 32.7, 23.2. FT-IR:  $\nu$  ( $\text{cm}^{-1}$ ) 2956, 2920, 2851, 1670, 1597, 1508, 1439, 1370, 1263. HRMS [ESI] calcd for  $\text{C}_{17}\text{H}_{19}\text{O}_2\text{S}$   $[\text{M}+\text{H}]^+$  287.1106, found 287.1097.

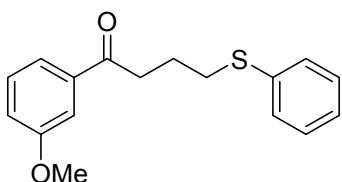

**2f:** yellow oil.  $^1\text{H}$  NMR (400 MHz,  $\text{CDCl}_3$ )  $\delta$  7.54-7.50 (m, 1H), 7.47 (dd,  $J = 2.4, 1.6$  Hz, 1H), 7.37-7.33 (m, 3H), 7.30-7.25 (m, 2H), 7.19-7.14 (m, 1H), 7.10 (ddd,  $J = 8.0, 2.8, 0.8$  Hz, 1H), 3.84 (s, 3H), 3.12 (t,  $J = 7.2$  Hz, 2H), 3.04 (t,  $J = 7.2$  Hz, 2H), 2.13-2.05 (m, 2H);  $^{13}\text{C}$  NMR (100 MHz,  $\text{CDCl}_3$ )  $\delta$  199.2, 159.8, 138.2, 136.2, 129.6, 129.2, 128.9, 126.0, 120.7, 119.6, 112.2, 55.5, 37.1, 33.1, 23.5. FT-IR:  $\nu$  ( $\text{cm}^{-1}$ ) 3058, 2921, 2850, 1682, 1582, 1429, 1256, 1165. HRMS [ESI] calcd for  $\text{C}_{17}\text{H}_{18}\text{O}_2\text{SNa}$   $[\text{M}+\text{Na}]^+$  309.0925, found 309.0915.

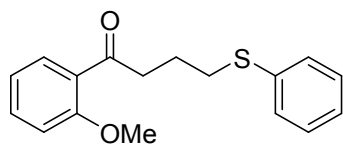

**2g:** yellow oil.  $^1\text{H}$  NMR (400 MHz,  $\text{CDCl}_3$ )  $\delta$  7.67 (dd,  $J = 8.0$ , 2.0 Hz, 1H), 7.45 (ddd,  $J = 8.4$ , 7.2, 1.6 Hz, 1H), 7.35-7.31 (m, 2H), 7.29-7.23 (m, 2H), 7.18-7.12 (m, 1H), 6.99 (ddd,  $J = 7.6$ , 7.2, 0.8 Hz, 1H), 6.94 (d,  $J = 8.4$  Hz, 1H), 3.87 (s, 3H), 3.13 (t,  $J = 7.2$  Hz, 2H), 3.00 (t,  $J = 7.2$  Hz, 2H), 2.08-2.01 (m, 2H);  $^{13}\text{C}$  NMR (100 MHz,  $\text{CDCl}_3$ )  $\delta$  201.8, 158.5, 136.6, 133.5, 130.3, 128.9, 128.8, 128.2, 125.8, 120.7, 111.5, 55.5, 42.5, 33.1, 23.9. FT-IR:  $\nu$  ( $\text{cm}^{-1}$ ) 3058, 2918, 2848, 1669, 1596, 1482, 1436, 1243. HRMS [ESI] calcd for  $\text{C}_{17}\text{H}_{18}\text{O}_2\text{SNa}$  [ $\text{M}+\text{Na}$ ] $^+$  309.0925, found 309.0921.

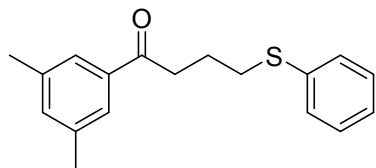

**2h:** yellow oil.  $^1\text{H}$  NMR (400 MHz,  $\text{CDCl}_3$ )  $\delta$  7.54 (s, 2H), 7.37-7.34 (m, 2H), 7.30-7.25 (m, 2H), 7.20-7.14 (m, 2H), 3.11 (t,  $J = 7.2$  Hz, 2H), 3.03 (t,  $J = 7.2$  Hz, 2H), 2.36 (s, 6H), 2.12-2.04 (m, 2H);  $^{13}\text{C}$  NMR (100 MHz,  $\text{CDCl}_3$ )  $\delta$  199.4, 137.7, 136.5, 135.7, 134.2, 128.7, 128.5, 125.5, 125.4, 36.6, 32.7, 23.1, 20.8. FT-IR:  $\nu$  ( $\text{cm}^{-1}$ ) 3054, 2918, 2858, 1679, 1604, 1480, 1438, 1317, 1297. HRMS [ESI] calcd for  $\text{C}_{18}\text{H}_{20}\text{OSNa}$  [ $\text{M}+\text{Na}$ ] $^+$  307.1133, found 307.1124.

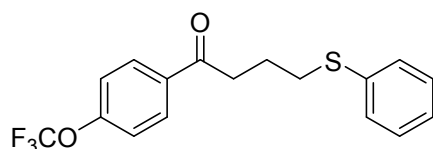

**2i:** yellow oil.  $^1\text{H}$  NMR (400 MHz,  $\text{CDCl}_3$ )  $\delta$  8.01-7.96 (m, 2H), 7.37-7.33 (m, 2H), 7.30-7.24 (m, 4H), 7.19-7.14 (m, 1H), 3.13 (t,  $J = 7.2$  Hz, 2H), 3.04 (t,  $J = 7.2$  Hz, 2H), 2.13-2.05 (m, 2H);  $^{13}\text{C}$  NMR (100 MHz,  $\text{CDCl}_3$ )  $\delta$  197.8, 152.6 (q,  $J_{\text{C-F}} = 1.7$  Hz), 136.0, 135.0, 130.0, 129.3, 129.0, 126.1, 120.4 (q,  $J_{\text{C-F}} = 0.7$  Hz), 120.3 (q,  $J_{\text{C-F}} = 257.1$  Hz), 36.9, 33.1, 23.3;  $^{19}\text{F}$  NMR (376 MHz,  $\text{CDCl}_3$ )  $\delta$  -57.6 (s). FT-IR:  $\nu$  ( $\text{cm}^{-1}$ ) 3061, 2926, 2855, 1687, 1602, 1481, 1439, 1253, 1208, 1162. HRMS [ESI] calcd for  $\text{C}_{17}\text{H}_{15}\text{F}_3\text{O}_2\text{SNa}$  [ $\text{M}+\text{Na}$ ] $^+$  363.0643, found 363.0645.

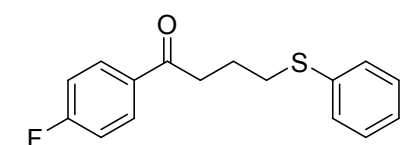

**2j:** yellow oil.  $^1\text{H}$  NMR (400 MHz,  $\text{CDCl}_3$ )  $\delta$  7.91-7.85 (m, 2H), 7.29-7.25 (m, 2H), 7.22-7.17 (m, 2H), 7.11-7.06 (m, 1H), 7.06-7.00 (m, 2H), 3.03 (t,  $J = 7.2$  Hz, 2H), 2.96 (t,  $J = 7.2$  Hz, 2H), 2.05-1.96 (m, 2H);  $^{13}\text{C}$  NMR (100 MHz,  $\text{CDCl}_3$ )  $\delta$  197.3, 165.3 (d,  $J_{\text{C-F}} = 253.1$  Hz), 135.6, 132.8 (d,  $J_{\text{C-F}} = 3.0$  Hz), 130.2 (d,  $J_{\text{C-F}} = 9.2$  Hz), 128.8, 128.5, 125.6, 115.2 (d,  $J_{\text{C-F}} = 21.7$  Hz), 36.3, 32.6, 22.9;  $^{19}\text{F}$  NMR (376 MHz,  $\text{CDCl}_3$ )  $\delta$  -105.3 (s). FT-IR:  $\nu$  ( $\text{cm}^{-1}$ ) 3060, 2926, 2855, 1684, 1596, 1505, 1480, 1225, 1156. HRMS [ESI] calcd for  $\text{C}_{16}\text{H}_{15}\text{FOSNa}$  [ $\text{M}+\text{Na}$ ] $^+$  297.0725, found 297.0734.

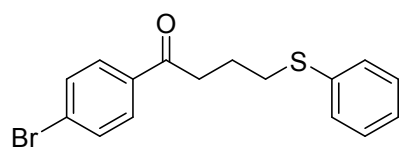

**2k:** yellow solid, m.p. 35-36 °C.  $^1\text{H}$  NMR (400 MHz,  $\text{CDCl}_3$ )  $\delta$  7.81-7.77 (m, 2H), 7.61-7.56 (m, 2H), 7.37-7.32 (m, 2H), 7.30-7.24 (m, 2H), 7.20-7.14 (m, 1H), 3.10 (t,  $J = 7.2$  Hz, 2H), 3.03 (t,  $J = 7.2$  Hz, 2H), 2.12-2.04 (m, 2H);  $^{13}\text{C}$  NMR (100 MHz,  $\text{CDCl}_3$ )  $\delta$  197.9, 135.5, 135.0, 131.4, 129.1, 128.8, 128.5, 127.8, 125.6, 36.4, 32.6, 22.8. FT-IR:  $\nu$  ( $\text{cm}^{-1}$ ) 3054, 2918, 2849, 1676, 1583, 1479, 1315, 1194. HRMS [ESI] calcd for  $\text{C}_{16}\text{H}_{15}\text{BrOSNa}$  [ $\text{M}+\text{Na}$ ] $^+$  356.9925, found 356.9921.

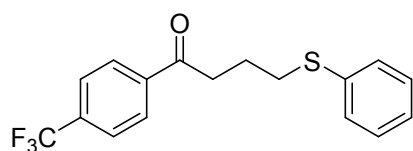

**2l:** yellow oil.  $^1\text{H}$  NMR (400 MHz,  $\text{CDCl}_3$ )  $\delta$  7.96 (d,  $J = 8.0$  Hz, 2H), 7.64 (d,  $J = 8.0$  Hz, 2H), 7.30-7.26 (m, 2H),

7.23-7.18 (m, 2H), 7.13-7.08 (m, 1H), 3.10 (t,  $J = 7.2$  Hz, 2H), 2.98 (t,  $J = 7.2$  Hz, 2H), 2.08-1.99 (m, 2H);  $^{13}\text{C}$  NMR (100 MHz,  $\text{CDCl}_3$ )  $\delta$  197.9, 138.9 (q,  $J_{\text{C-F}} = 1.0$  Hz), 135.4, 133.9 (q,  $J_{\text{C-F}} = 32.5$  Hz), 128.8, 128.5, 127.9, 125.7, 125.2 (q,  $J_{\text{C-F}} = 3.6$  Hz), 123.1 (q,  $J_{\text{C-F}} = 271.0$  Hz), 36.7, 32.5, 22.7;  $^{19}\text{F}$  NMR (376 MHz,  $\text{CDCl}_3$ )  $\delta$  -63.1 (s). FT-IR:  $\nu$  ( $\text{cm}^{-1}$ ) 3062, 2960, 2853, 1683, 1581, 1481, 1365, 1326. HRMS [ESI] calcd for  $\text{C}_{17}\text{H}_{15}\text{F}_3\text{OSNa}$  [ $\text{M}+\text{Na}$ ] $^+$  347.0693, found 347.0695.

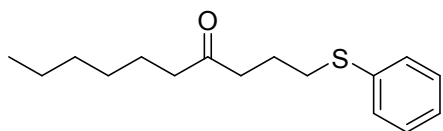

**2m:** yellow solid, m.p. 33-34 °C.  $^1\text{H}$  NMR (400 MHz,  $\text{CDCl}_3$ )  $\delta$  7.28-7.24 (m, 2H), 7.23-7.18 (m, 2H), 7.12-7.07 (m, 1H), 2.87 (t,  $J = 7.2$  Hz, 2H), 2.49 (t,  $J = 7.2$  Hz, 2H), 2.30 (t,  $J = 7.2$  Hz, 2H), 1.88-1.80 (m, 2H), 1.54-1.44 (m, 2H), 1.23-1.19 (m, 6H), 0.81 (t,  $J = 6.8$  Hz, 3H);  $^{13}\text{C}$  NMR (100 MHz,  $\text{CDCl}_3$ )  $\delta$  210.0, 135.7, 128.7, 128.4, 125.5, 42.5, 40.4, 32.5, 31.1, 28.4, 23.3, 22.5, 22.0, 13.6. FT-IR:  $\nu$  ( $\text{cm}^{-1}$ ) 3057, 2927, 2870, 1698, 1583, 1479, 1381, 1230. HRMS [ESI] calcd for  $\text{C}_{16}\text{H}_{24}\text{OSNa}$  [ $\text{M}+\text{Na}$ ] $^+$  287.1446, found 287.1440.

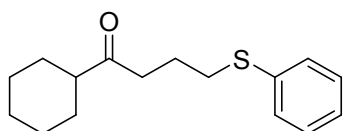

**2n:** yellow oil.  $^1\text{H}$  NMR (400 MHz,  $\text{CDCl}_3$ )  $\delta$  7.28-7.24 (dd,  $J = 8.4, 1.2$  Hz, 2H), 7.23-7.18 (m, 2H), 7.12-7.07 (m, 1H), 2.86 (t,  $J = 7.2$  Hz, 2H), 2.53 (t,  $J = 7.2$  Hz, 2H), 2.27-2.20 (m, 1H), 1.87-1.79 (m, 2H), 1.78-1.66 (m, 4H), 1.62-1.54 (m, 1H), 1.30-1.12 (m, 5H);  $^{13}\text{C}$  NMR (100 MHz,  $\text{CDCl}_3$ )  $\delta$  212.9, 135.8, 128.7, 128.4, 125.5, 50.4, 38.3, 32.6, 28.0, 25.4, 25.2, 22.4. FT-IR:  $\nu$  ( $\text{cm}^{-1}$ ) 3058, 2926, 2852, 1704, 1584, 1480, 1406, 1290. HRMS [ESI] calcd for  $\text{C}_{16}\text{H}_{22}\text{OSNa}$  [ $\text{M}+\text{Na}$ ] $^+$  285.1289, found 285.1282.

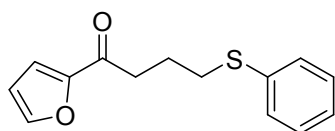

**2o:** yellow oil.  $^1\text{H}$  NMR (400 MHz,  $\text{CDCl}_3$ )  $\delta$  7.57 (d,  $J = 1.2$  Hz, 1H), 7.37-7.33 (m, 2H), 7.30-7.25 (m, 2H), 7.19-7.15 (m, 2H), 6.52 (dd,  $J = 3.6, 1.6$  Hz, 1H), 3.02 (t,  $J = 7.2$  Hz, 2H), 3.00 (t,  $J = 7.2$  Hz, 2H), 2.11-2.03 (m, 2H);  $^{13}\text{C}$  NMR (100 MHz,  $\text{CDCl}_3$ )  $\delta$  188.1, 152.2, 145.8, 135.6, 128.8, 128.4, 125.5, 116.5, 111.7, 36.4, 32.6, 22.9. FT-IR:  $\nu$  ( $\text{cm}^{-1}$ ) 3131, 2924, 2852, 1671, 1568, 1467, 1394, 1251. HRMS [ESI] calcd for  $\text{C}_{14}\text{H}_{14}\text{O}_2\text{SNa}$  [ $\text{M}+\text{Na}$ ] $^+$  269.0612, found 269.0595.

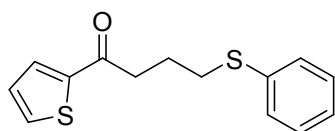

**2p:** yellow oil.  $^1\text{H}$  NMR (400 MHz,  $\text{CDCl}_3$ )  $\delta$  7.62 (dd,  $J = 4.0, 1.2$  Hz, 1H), 7.55 (dd,  $J = 4.8, 1.2$  Hz, 1H), 7.30-7.26 (m, 2H), 7.23-7.18 (m, 2H), 7.12-7.07 (m, 1H), 7.04 (dd,  $J = 4.8, 4.0$  Hz, 1H), 3.01 (t,  $J = 7.2$  Hz, 2H), 2.96 (t,  $J = 7.2$  Hz, 2H), 2.06-1.98 (m, 2H);  $^{13}\text{C}$  NMR (100 MHz,  $\text{CDCl}_3$ )  $\delta$  191.9, 143.7, 135.6, 133.1, 131.4, 128.8, 128.5, 127.6, 125.6, 37.2, 32.6, 23.3. FT-IR:  $\nu$  ( $\text{cm}^{-1}$ ) 3075, 2924, 2855, 1656, 1582, 1518, 1414, 1234. HRMS [ESI] calcd for  $\text{C}_{14}\text{H}_{14}\text{OS}_2\text{Na}$  [ $\text{M}+\text{Na}$ ] $^+$  285.0384, found 285.0373.

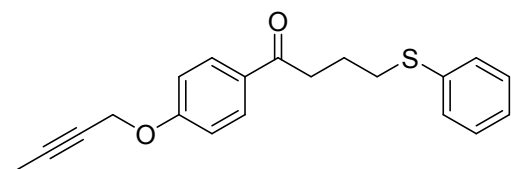

**2q:** yellow oil.  $^1\text{H}$  NMR (400 MHz,  $\text{CDCl}_3$ )  $\delta$  7.95-7.91 (m, 2H), 7.37-7.33 (m, 2H), 7.29-7.26 (m, 2H), 7.19-7.14 (m, 1H), 7.01-6.97 (m, 2H),

4.71 (q,  $J = 2.4$  Hz, 2H), 3.09 (t,  $J = 7.2$  Hz, 2H), 3.04 (t,  $J = 6.8$  Hz, 2H), 2.12-2.05 (m, 2H), 1.87 (t,  $J = 2.4$  Hz, 3H);  $^{13}\text{C}$  NMR (100 MHz,  $\text{CDCl}_3$ )  $\delta$  197.5, 161.1, 135.7, 129.9, 129.7, 128.7, 128.4, 125.5, 114.1, 84.0, 72.8, 56.1, 36.2, 32.7, 23.1, 3.2. FT-IR:  $\nu$  ( $\text{cm}^{-1}$ ) 3058, 2921, 2853, 1674, 1599, 1508, 1480, 1439, 1309, 1223. HRMS [ESI] calcd for  $\text{C}_{20}\text{H}_{21}\text{O}_2\text{S}$   $[\text{M}+\text{H}]^+$  325.1262, found 325.1268.

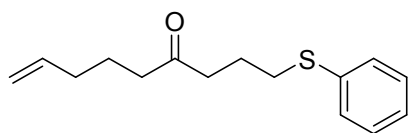

**2r**: yellow oil.  $^1\text{H}$  NMR (400 MHz,  $\text{CDCl}_3$ )  $\delta$  7.35-7.32 (m, 2H), 7.30-7.25 (m, 2H), 7.20-7.14 (m, 1H), 5.80-5.70 (m, 1H), 5.04-4.94 (m, 2H), 2.94 (t,  $J = 7.2$  Hz, 2H), 2.56 (t,  $J = 7.2$  Hz, 2H), 2.39 (t,  $J = 7.2$  Hz, 2H), 2.04 (dd,  $J =$

14.4, 7.2 Hz, 2H), 1.95-1.87 (m, 2H), 1.71-1.62 (m, 2H);  $^{13}\text{C}$  NMR (100 MHz,  $\text{CDCl}_3$ )  $\delta$  209.6, 137.5, 135.7, 128.8, 128.4, 125.5, 114.8, 41.5, 40.5, 32.6, 32.5, 22.5, 22.3. FT-IR:  $\nu$  ( $\text{cm}^{-1}$ ) 3075, 2919, 2850, 1710, 1640, 1584, 1481, 1439, 1371, 1302. HRMS [ESI] calcd for  $\text{C}_{15}\text{H}_{21}\text{OS}$   $[\text{M}+\text{H}]^+$  249.1313, found 249.1301.

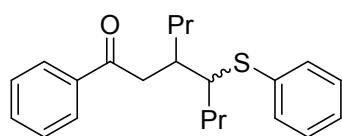

**2s** ( $dr = 1.2:1$ ): yellow oil.  $^1\text{H}$  NMR (400 MHz,  $\text{CDCl}_3$ )  $\delta$  7.95-7.88 (m, 4H, two isomers), 7.57-7.49 (m, 2H, two isomers), 7.46-7.34 (m, 6H, two isomers), 7.32-7.27 (m, 2H, two isomers), 7.25-7.07 (m, 6H, two isomers), 3.48 (dd,  $J = 16.8, 6.4$  Hz, 1H, one

isomer), 3.35-3.31 (m, 1H, one isomer), 3.29-3.25 (m, 1H, one isomer), 3.06 (dd,  $J = 16.8, 7.2$  Hz, 1H, one isomer), 2.99 (dd,  $J = 16.8$  Hz, 5.6 Hz, 1H, one isomer), 2.79 (dd,  $J = 16.4$  Hz, 6.8 Hz, 1H, one isomer), 2.55-2.44 (m, 2H, two isomers), 1.72-1.37 (m, 16H, two isomers), 0.95-0.82 (m, 12H, two isomers);  $^{13}\text{C}$  NMR (100 MHz,  $\text{CDCl}_3$ )  $\delta$  200.0 & 199.4 (two isomers), 136.8 & 136.7 (two isomers), 136.1 & 136.0 (two isomers), 132.5 & 132.4 (two isomers), 130.7 & 130.6 (two isomers), 128.4 & 128.3 (two isomers), 128.1 & 128.0 (two isomers), 127.6 & 127.6 (two isomers), 125.9 & 125.8 (two isomers), 52.7 & 52.4 (two isomers), 39.9 & 39.7 (two isomers), 37.2 & 37.1 (two isomers), 34.5 & 33.7 (two isomers), 33.6 & 32.2 (two isomers), 20.7 & 20.4 (two isomers), 20.3 & 20.1 (two isomers), 13.7 & 13.7 (two isomers), 13.5 & 13.4 (two isomers). FT-IR:  $\nu$  ( $\text{cm}^{-1}$ ) 3059, 2956, 2926, 2855, 1683, 1581, 1478, 1363, 1286. HRMS [ESI] calcd for  $\text{C}_{22}\text{H}_{28}\text{OSNa}$   $[\text{M}+\text{Na}]^+$  363.1759, found 363.1749.

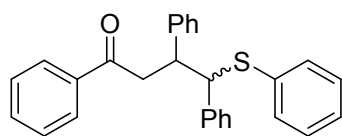

**2t** ( $dr = 1.3:1$ ): yellow solid, m.p. 90-92 °C.  $^1\text{H}$  NMR (400 MHz,  $\text{CDCl}_3$ )  $\delta$  7.95-7.91 (m, 2H, two isomers), 7.82-7.77 (m, 2H, two isomers), 7.58-7.49 (m, 2H, two isomers), 7.48-7.43 (m, 2H, two isomers), 7.42-7.32 (m, 2H, two isomers), 7.27-7.17 (m, 14H,

two isomers), 7.15-7.05 (m, 16H, two isomers), 4.58 (d,  $J = 8.8$  Hz, 1H, one isomer), 4.56 (d,  $J = 8.8$  Hz, 1H, one isomer), 4.07 (ddd,  $J = 8.4, 8.4, 4.2$  Hz, 1H, one isomer), 4.00 (ddd,  $J = 8.4, 8.4, 4.2$  Hz, 1H, one isomer), 3.93 (dd,  $J = 17.2, 5.2$  Hz, 1H, one isomer), 3.55 (dd,  $J = 17.2, 9.2$  Hz, 1H, one isomer), 3.49 (dd,  $J = 16.8, 5.2$  Hz, 1H, one isomer), 3.40 (dd,  $J = 17.2, 8.8$  Hz, 1H, one isomer);  $^{13}\text{C}$  NMR (100 MHz,  $\text{CDCl}_3$ )  $\delta$  197.9 & 197.8 (two isomers), 140.7 & 140.5 (two isomers), 140.1, & 139.8 (two isomers), 136.6 & 136.5 (two isomers), 134.6 & 134.6 (two isomers), 132.5 & 132.5 (two isomers), 131.7 & 131.4 (two isomers), 128.3 & 128.2 (two isomers), 128.2 & 128.2 (two isomers), 128.1 & 128.1 (two isomers), 128.1 & 128.0 (two isomers), 127.7 & 127.7 (two isomers), 127.6 & 127.5 (two isomers), 127.4 & 127.3 (two isomers),

126.8 & 126.6 (two isomers), 126.5 & 126.4 (two isomers), 126.4 & 126.1 (two isomers), 59.1 & 58.8 (two isomers), 46.4 & 45.9 (two isomers), 42.5 & 42.1 (two isomers). FT-IR:  $\nu$  ( $\text{cm}^{-1}$ ) 3029, 2918, 2851, 1677, 1602, 1561, 1449, 1367. HRMS [ESI] calcd for  $\text{C}_{28}\text{H}_{24}\text{OSNa}$   $[\text{M}+\text{Na}]^+$  431.1446, found 431.1436.

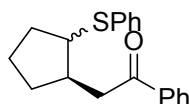

**2u** (*dr* = 1.2:1): colorless oil.  $^1\text{H}$  NMR (400 MHz,  $\text{CDCl}_3$ )  $\delta$  7.95-7.90 (m, 2H, two isomers), 7.90-7.85 (m, 2H, two isomers), 7.58-7.50 (m, 2H, two isomers), 7.47-7.38 (m, 6H, two isomers), 7.36-7.32 (m, 2H, two isomers), 7.30-7.26 (m, 2H, two isomers), 7.25-7.18 (m, 3H, two isomers), 7.14-7.08 (m, 1H, one isomer), 3.90 (dd,  $J$  = 10.8, 6.0 Hz, 1H, one isomer), 3.42 (dd,  $J$  = 16.0, 3.6 Hz, 1H, one isomer), 3.41 (dd,  $J$  = 17.2, 6.4 Hz, 1H, one isomer), 3.19 (dd,  $J$  = 15.6, 7.2 Hz, 1H, one isomer), 2.95 (dd,  $J$  = 17.2, 8.0 Hz, 1H, one isomer), 2.84 (dd,  $J$  = 16.0, 10.0 Hz, 1H, one isomer), 2.88-2.78 (m, 1H, one isomer), 2.42-2.31 (m, 1H, one isomer), 2.22-2.17 (m, 1H, one isomer), 2.13-2.07 (m, 2H, two isomers), 1.94-1.78 (m, 3H, two isomers), 1.74-1.63 (m, 4H, two isomers), 1.31-1.26 (m, 2H, two isomers);  $^{13}\text{C}$  NMR (100 MHz,  $\text{CDCl}_3$ )  $\delta$  199.2 & 199.0 (two isomers), 136.6 & 136.5 (two isomers), 136.0 & 135.6 (two isomers), 132.5 & 132.4 (two isomers), 130.6 & 129.7 (two isomers), 128.4 & 128.4 (two isomers), 128.1 & 128.0 (two isomers), 127.7 & 127.6 (two isomers), 126.0 & 125.6 (two isomers), 51.8 & 51.2 (two isomers), 42.8 & 41.8 (two isomers), 39.5 & 39.1 (two isomers), 33.4 & 32.2 (two isomers), 31.1 & 29.6 (two isomers), 22.8 & 21.4 (two isomers). FT-IR:  $\nu$  ( $\text{cm}^{-1}$ ) 3017, 2926, 2855, 1681, 1598, 1452, 1276. HRMS [ESI] calcd for  $\text{C}_{19}\text{H}_{20}\text{OSNa}$   $[\text{M}+\text{Na}]^+$  319.1133, found 319.1146.

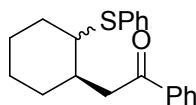

**2v** (*dr* = 1:1): yellow oil.  $^1\text{H}$  NMR (400 MHz,  $\text{CDCl}_3$ )  $\delta$  7.99-7.94 (m, 2H, two isomers), 7.92-7.88 (m, 2H, two isomers), 7.58-7.50 (m, 2H, two isomers), 7.48-7.38 (m, 6H, two isomers), 7.35-7.16 (m, 7H, two isomers), 7.14-7.08 (m, 1H, one isomer), 3.81 (dd,  $J$  = 16.4, 3.2 Hz, 1H, one isomer), 3.65 (dd,  $J$  = 7.8, 3.6 Hz, 1H, one isomer), 3.37 (dd,  $J$  = 16.8, 6.0 Hz, 1H, one isomer), 2.95 (dd,  $J$  = 16.8, 6.8 Hz, 1H, one isomer), 2.89 (ddd,  $J$  = 11.2, 11.2, 4.0 Hz, 1H, one isomer), 2.80 (dd,  $J$  = 16.4, 6.4 Hz, 1H, one isomer), 2.62-2.53 (m, 1H, one isomer), 2.20-2.08 (m, 2H, two isomers), 1.97-1.60 (m, 7H, two isomers), 1.55-1.35 (m, 5H, two isomers), 1.34-1.05 (m, 3H, two isomers);  $^{13}\text{C}$  NMR (100 MHz,  $\text{CDCl}_3$ )  $\delta$  199.4 & 199.3 (two isomers), 136.8 & 136.8 (two isomers), 135.6 & 134.4 (two isomers), 132.4 & 132.4 (two isomers), 131.9 & 130.8 (two isomers), 128.4 & 128.4 (two isomers), 128.1 & 128.0 (two isomers), 127.7 & 127.6 (two isomers), 126.4 & 125.9 (two isomers), 52.4 & 51.3 (two isomers), 43.5 & 38.5 (two isomers), 36.3 & 34.2 (two isomers), 32.7 & 30.8 (two isomers), 28.2 & 28.2 (two isomers), 26.1 & 25.0 (two isomers), 24.2 & 21.5 (two isomers). FT-IR:  $\nu$  ( $\text{cm}^{-1}$ ) 3058, 2925, 2853, 1682, 1581, 1447, 1403, 1249. HRMS [ESI] calcd for  $\text{C}_{20}\text{H}_{22}\text{OSNa}$   $[\text{M}+\text{Na}]^+$  333.1289, found 333.1278.

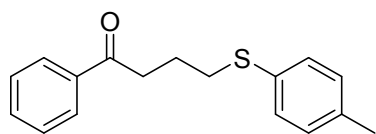

**2w**: yellow oil.  $^1\text{H}$  NMR (400 MHz,  $\text{CDCl}_3$ )  $\delta$  7.96-7.92 (m, 2H), 7.58-7.53 (m, 1H), 7.47-7.42 (m, 2H), 7.28-7.25 (m, 2H), 7.09 (d,  $J$  = 8.0 Hz, 2H), 3.13 (t,  $J$  = 7.2 Hz, 2H), 3.00 (t,  $J$  = 7.2 Hz, 2H), 2.31 (s, 3H), 2.10-2.02 (m, 2H);  $^{13}\text{C}$  NMR (100

MHz, CDCl<sub>3</sub>)  $\delta$  199.0, 136.4, 135.7, 132.6, 131.8, 129.7, 129.2, 128.1, 127.6, 36.5, 33.4, 23.0, 20.5. FT-IR:  $\nu$  (cm<sup>-1</sup>) 3058, 3022, 2922, 1683, 1597, 1492, 1448, 1223. HRMS [ESI] calcd for C<sub>17</sub>H<sub>18</sub>OSNa [M+Na]<sup>+</sup> 293.0976, found 293.0981.

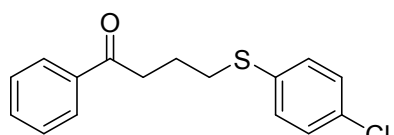

**2x**: yellow solid, m.p. 48-50 °C. <sup>1</sup>H NMR (400 MHz, CDCl<sub>3</sub>)  $\delta$  7.89-7.85 (m, 2H), 7.52-7.47 (m, 1H), 7.39 (dd,  $J$  = 7.6, 7.6 Hz, 2H), 7.23-7.15 (m, 4H), 3.06 (t,  $J$  = 7.2 Hz, 2H), 2.95 (t,  $J$  = 7.2 Hz, 2H), 2.05-1.97 (m, 2H); <sup>13</sup>C NMR (100 MHz, CDCl<sub>3</sub>)  $\delta$  198.8, 136.3, 134.2, 132.7, 131.5, 130.1, 128.6, 128.2, 127.5, 36.4, 32.8, 22.8. FT-IR:  $\nu$  (cm<sup>-1</sup>) 3058, 2926, 2852, 1682, 1598, 1476, 1447, 1366. HRMS [ESI] calcd for C<sub>16</sub>H<sub>15</sub>ClOSNa [M+Na]<sup>+</sup> 313.0430, found 313.0423.

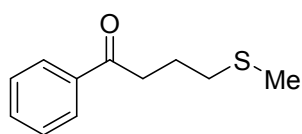

**2y**: yellow oil. <sup>1</sup>H NMR (400 MHz, CDCl<sub>3</sub>)  $\delta$  7.98-7.96 (m, 2H), 7.59-7.54 (m, 1H), 7.48-7.44 (m, 2H), 3.12 (t,  $J$  = 7.2 Hz, 2H), 2.61 (t,  $J$  = 7.2 Hz, 2H), 2.11 (s, 3H), 2.10-2.02 (m, 2H); <sup>13</sup>C NMR (100 MHz, CDCl<sub>3</sub>)  $\delta$  199.2, 136.5, 132.6, 128.1, 127.6, 36.5, 33.2, 22.6, 14.8. FT-IR:  $\nu$  (cm<sup>-1</sup>) 3060, 2916, 2854, 1682, 1597, 1580, 1448, 1364, 1224. HRMS [ESI] calcd for C<sub>11</sub>H<sub>15</sub>OS [M+H]<sup>+</sup> 195.0844, found 195.0843.

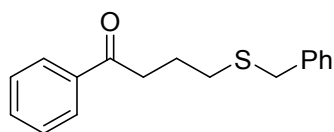

**2z**: yellow oil. <sup>1</sup>H NMR (400 MHz, CDCl<sub>3</sub>)  $\delta$  7.96-7.94 (m, 2H), 7.59-7.54 (m, 1H), 7.49-7.43 (m, 2H), 7.33-7.28 (m, 4H), 7.25-7.20 (m, 1H), 3.72 (s, 2H), 3.07 (t,  $J$  = 7.2 Hz, 2H), 2.53 (t,  $J$  = 7.2 Hz, 2H), 2.06-1.98 (m, 2H); <sup>13</sup>C NMR (100 MHz, CDCl<sub>3</sub>)  $\delta$  199.1, 137.9, 136.4, 132.6, 128.4, 128.1, 128.0, 127.6, 126.5, 36.7, 35.6, 30.4, 22.8. FT-IR:  $\nu$  (cm<sup>-1</sup>) 3029, 2922, 2951, 1730, 1684, 1598, 1494, 1449, 1366, 1245. HRMS [ESI] calcd for C<sub>17</sub>H<sub>19</sub>OS [M+H]<sup>+</sup> 271.1157, found 271.1168.

## Preparation of the compound **4**, **5**, and **6**:

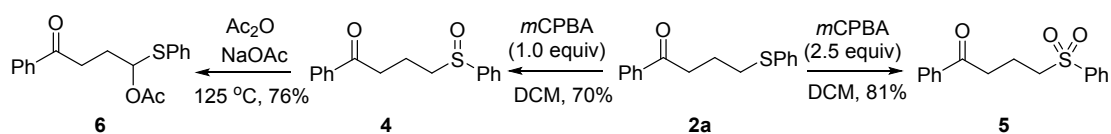

To a solution of **2a** (100 mg, 0.39 mmol) in DCM (10 mL) was added dropwise *m*CPBA (75wt%, 90 mg, 0.39 mmol) at 0°C. After the mixture was stirred for 1 h, aqueous sat. NaHCO<sub>3</sub> solution (10 mL) was slowly added. The mixture was extracted with DCM (10 mL×3). The combined organic layers were washed with brine (20 mL), dried and concentrated to give a crude residue, which was purified by flash chromatography on silica gel (EA/PE = 1:1) to afford the product **4** (74 mg, 70%).

To a solution of **2a** (100 g, 0.39 mmol) in DCM (30 mL) was added dropwise *m*CPBA (75wt%, 225 mg, 0.98 mmol) at 0°C. After the mixture was stirred for 1 h, aqueous sat. NaHCO<sub>3</sub> solution (10 mL) was slowly added. The mixture was extracted with DCM (10 mL×3). The combined organic layers were washed with brine (20 mL), dried and concentrated to give a crude



residue, which was purified by flash chromatography on silica gel (EA/PE = 1:2) to afford the product **5** (91mg, 81%).

Ac<sub>2</sub>O (1.0 mL) and NaOAc (90 mg, 1.1 mmol) was added to a flask, which was loaded with the compound **4** (30 mg, 0.11 mmol). The reaction mixture was heated to 125 °C and stirred for 12 h. After being cooled to room temperature, the reaction mixture was filtered and washed with DCM (5 mL×3). The solution was concentrated and the residue was purified by flash chromatography on silica gel (EA/PE = 1:6) to afford the product **6** (26 mg, 76%).

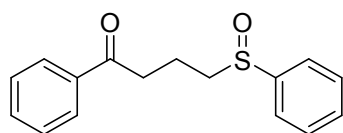

**4**: white solid, m.p. 75-77 °C. <sup>1</sup>H NMR (400 MHz, CDCl<sub>3</sub>) δ 7.92 (d, *J* = 7.2 Hz, 2H), 7.62 (dd, *J* = 8.0, 1.6 Hz, 2H), 7.58-7.42 (m, 6H), 3.16 (ddd, *J* = 6.8, 6.8, 2.0 Hz, 2H), 3.01-2.84 (m, 2H), 2.29-2.17 (m, 1H), 2.17-2.05 (m, 1H); <sup>13</sup>C NMR (100 MHz, CDCl<sub>3</sub>) δ 198.2, 143.2, 136.1, 132.8, 130.5, 128.8, 128.2, 127.5, 123.5, 55.7, 36.4, 16.5. FT-IR: ν (cm<sup>-1</sup>) 3035, 2925, 2859, 1678, 1592, 1456, 1351, 1282. HRMS [ESI] calcd for C<sub>16</sub>H<sub>16</sub>O<sub>2</sub>SNa [M+Na]<sup>+</sup> 295.0769, found 295.0765.

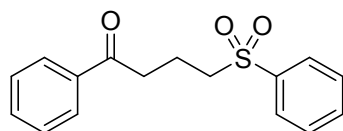

**5**: white solid, m.p. 83-85 °C. <sup>1</sup>H NMR (400 MHz, CDCl<sub>3</sub>) δ 7.94-7.89 (m, 4H), 7.68-7.62 (m, 1H), 7.59-7.53 (m, 3H), 7.44 (dd, *J* = 8.0, 8.0 Hz, 2H), 3.25 (t, *J* = 7.2 Hz, 2H), 3.18 (t, *J* = 6.8 Hz, 2H), 2.21-2.12 (m, 2H); <sup>13</sup>C NMR (100 MHz, CDCl<sub>3</sub>) δ 197.9, 138.6, 135.9, 133.3, 132.9, 128.9, 128.2, 127.6, 127.5, 54.7, 35.8, 16.9. FT-IR: ν (cm<sup>-1</sup>) 3026, 2928, 2842, 1670, 1587, 1452, 1350, 1280. HRMS [ESI] calcd for C<sub>16</sub>H<sub>16</sub>O<sub>3</sub>SNa [M+Na]<sup>+</sup> 311.0718, found 311.0729.

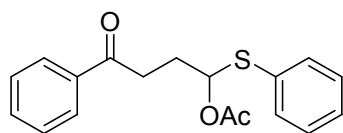

**6**: colorless oil. <sup>1</sup>H NMR (400 MHz, CDCl<sub>3</sub>) δ 7.94 (d, *J* = 7.2 Hz, 2H), 7.57 (dd, *J* = 7.2, 7.2 Hz, 1H), 7.52-7.43 (m, 4H), 7.35-7.31 (m, 3H), 6.21 (t, *J* = 6.8 Hz, 1H), 3.16-3.10 (m, 2H), 2.28 (ddd, *J* = 14.8, 6.8, 2.4 Hz, 2H), 2.04 (s, 3H); <sup>13</sup>C NMR (100 MHz, CDCl<sub>3</sub>) δ 197.8, 169.2, 136.1, 133.4, 132.7, 130.7, 128.6, 128.2, 128.0, 127.5, 79.3, 34.1, 28.5, 20.6. FT-IR: ν (cm<sup>-1</sup>) 3046, 2949, 2837, 1682, 1590, 1456, 1353, 1280.

#### 4. <sup>1</sup>H, <sup>13</sup>C, and <sup>19</sup>F NMR spectra of products

7.957  
7.950  
7.937  
7.932  
7.928  
7.571  
7.557  
7.552  
7.547  
7.537  
7.534  
7.531  
7.466  
7.462  
7.449  
7.446  
7.432  
7.428  
7.405  
7.362  
7.357  
7.346  
7.344  
7.342  
7.336  
7.291  
7.286  
7.272  
7.269  
7.256  
7.253  
7.185  
7.182  
7.179  
7.168  
7.164  
3.142  
3.125  
3.059  
3.042  
3.024  
2.129  
2.111  
2.094  
2.076  
2.059  
-0.000

| Parameter                | Value               |
|--------------------------|---------------------|
| 1 Origin                 | Bruker BioSpin GmbH |
| 2 Solvent                | CDCl3               |
| 3 Temperature            | 298.1               |
| 4 Number of Scans        | 2                   |
| 5 Spectrometer Frequency | 400.13              |
| 6 Nucleus                | 1H                  |

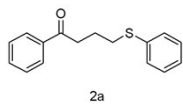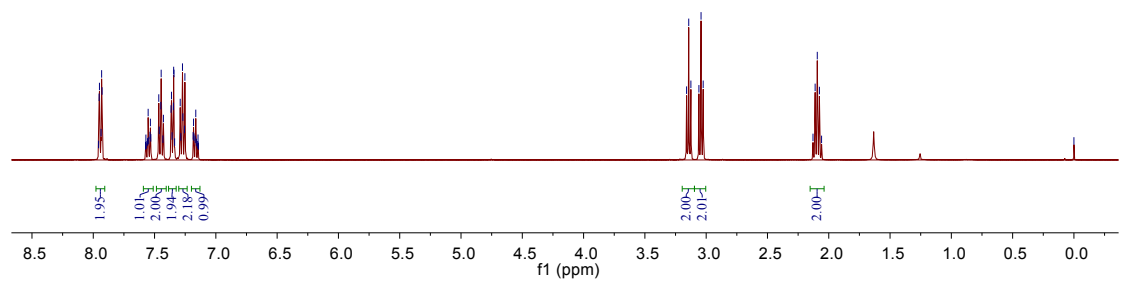

198.955  
136.354  
135.672  
132.625  
128.751  
128.469  
128.130  
127.550  
125.512  
76.888  
76.570  
76.252  
36.488  
32.648  
22.953

| Parameter                | Value               |
|--------------------------|---------------------|
| 1 Origin                 | Bruker BioSpin GmbH |
| 2 Solvent                | CDCl3               |
| 3 Temperature            | 298.4               |
| 4 Number of Scans        | 28                  |
| 5 Spectrometer Frequency | 100.61              |
| 6 Nucleus                | 13C                 |

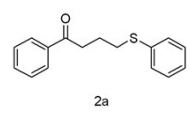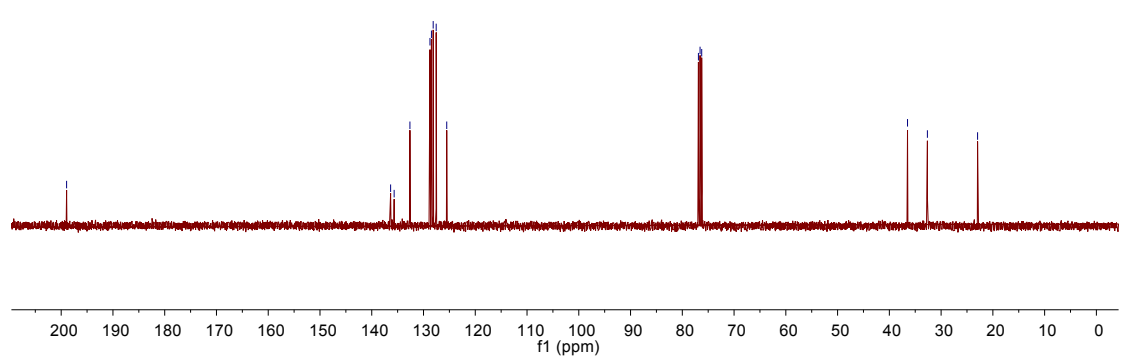

7.851  
7.830  
7.362  
7.359  
7.341  
7.339  
7.289  
7.284  
7.270  
7.251  
7.230  
7.180  
7.161  
7.143

3.127  
3.109  
3.092  
3.050  
3.033  
3.015  
2.401  
2.116  
2.099  
2.081  
2.064  
2.046

0.000

| Parameter                | Value               |
|--------------------------|---------------------|
| 1 Origin                 | Bruker BioSpin GmbH |
| 2 Solvent                | CDCl3               |
| 3 Temperature            | 298.2               |
| 4 Number of Scans        | 4                   |
| 5 Spectrometer Frequency | 400.13              |
| 6 Nucleus                | 1H                  |

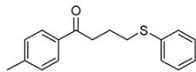

2b

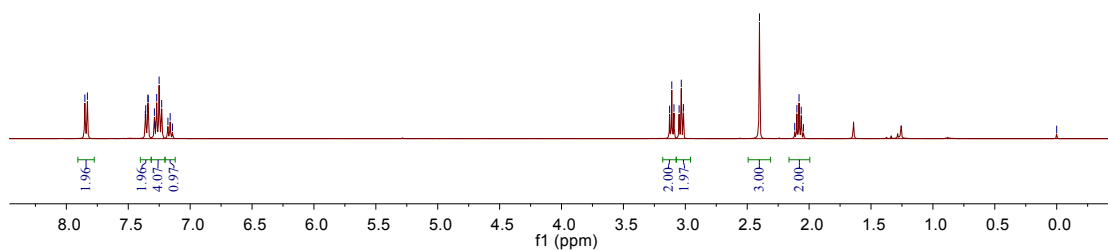

198.610

143.396  
135.732  
133.904  
128.801  
128.718  
128.455  
127.676  
125.473

76.893  
76.575  
76.258

36.400  
32.674  
23.054  
21.168

| Parameter                | Value               |
|--------------------------|---------------------|
| 1 Origin                 | Bruker BioSpin GmbH |
| 2 Solvent                | CDCl3               |
| 3 Temperature            | 298.2               |
| 4 Number of Scans        | 44                  |
| 5 Spectrometer Frequency | 100.61              |
| 6 Nucleus                | 13C                 |

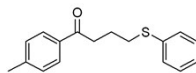

2b

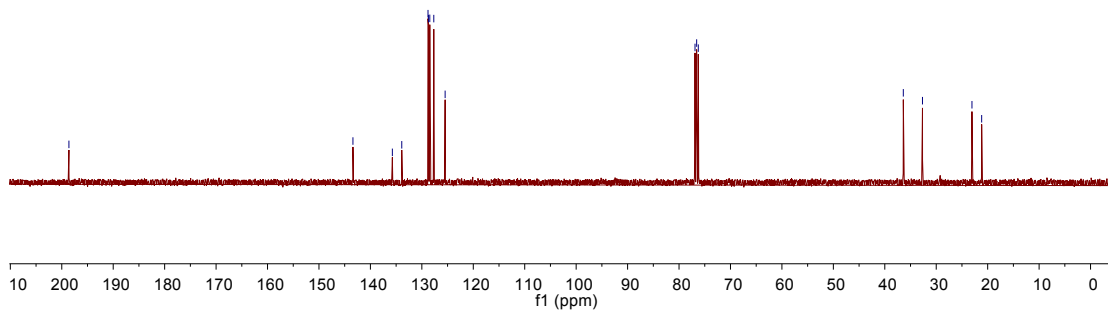

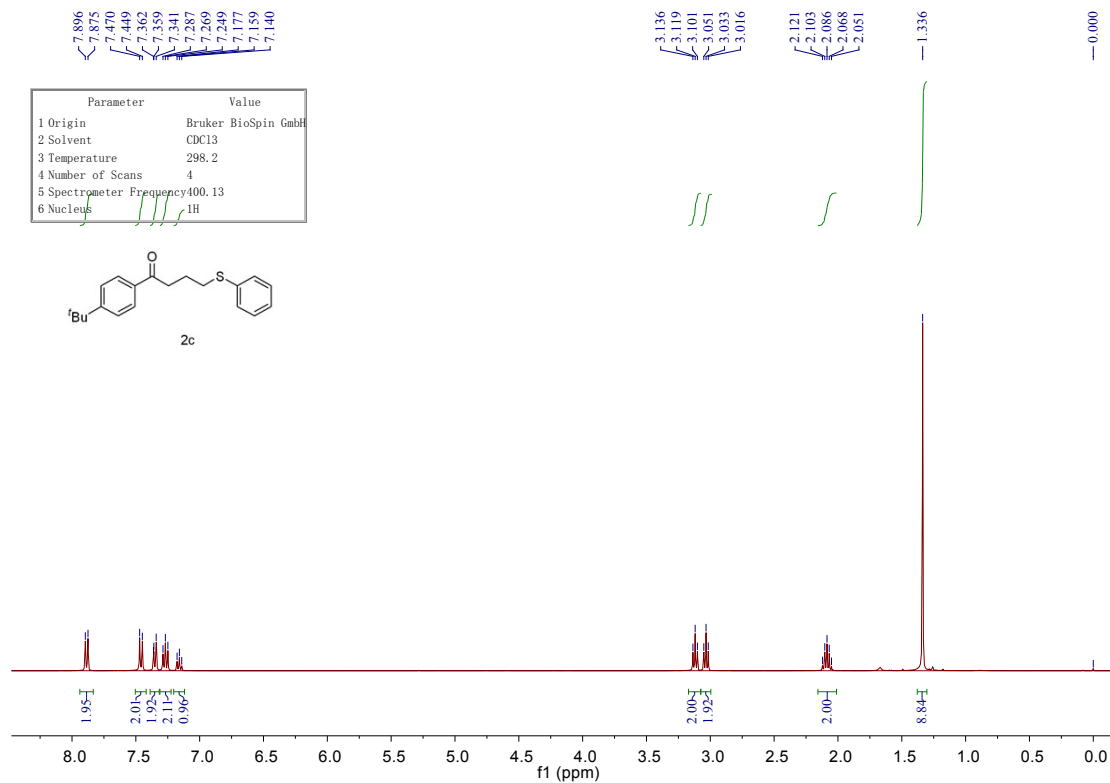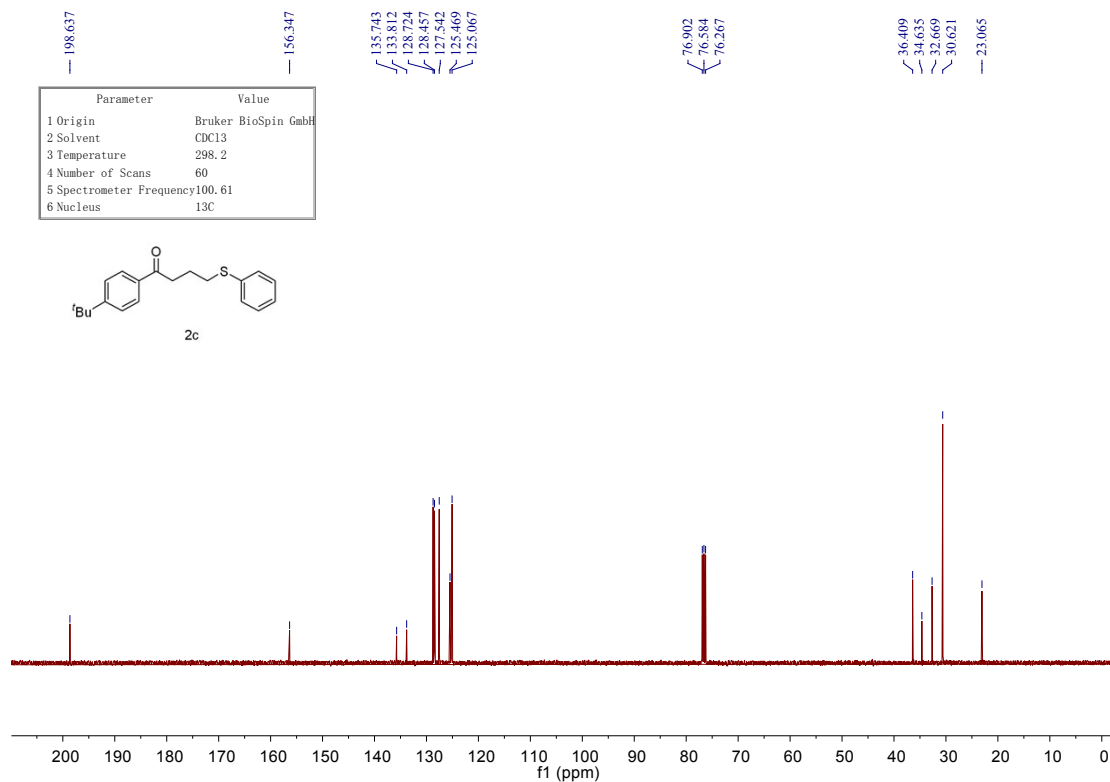

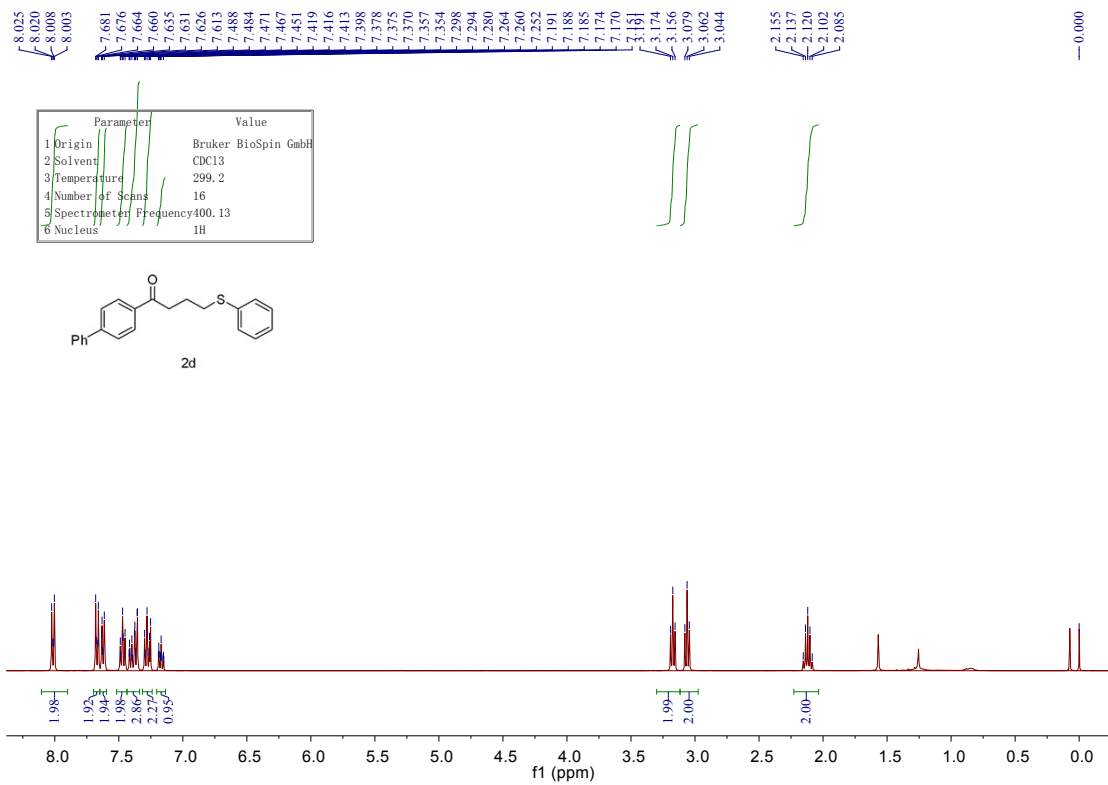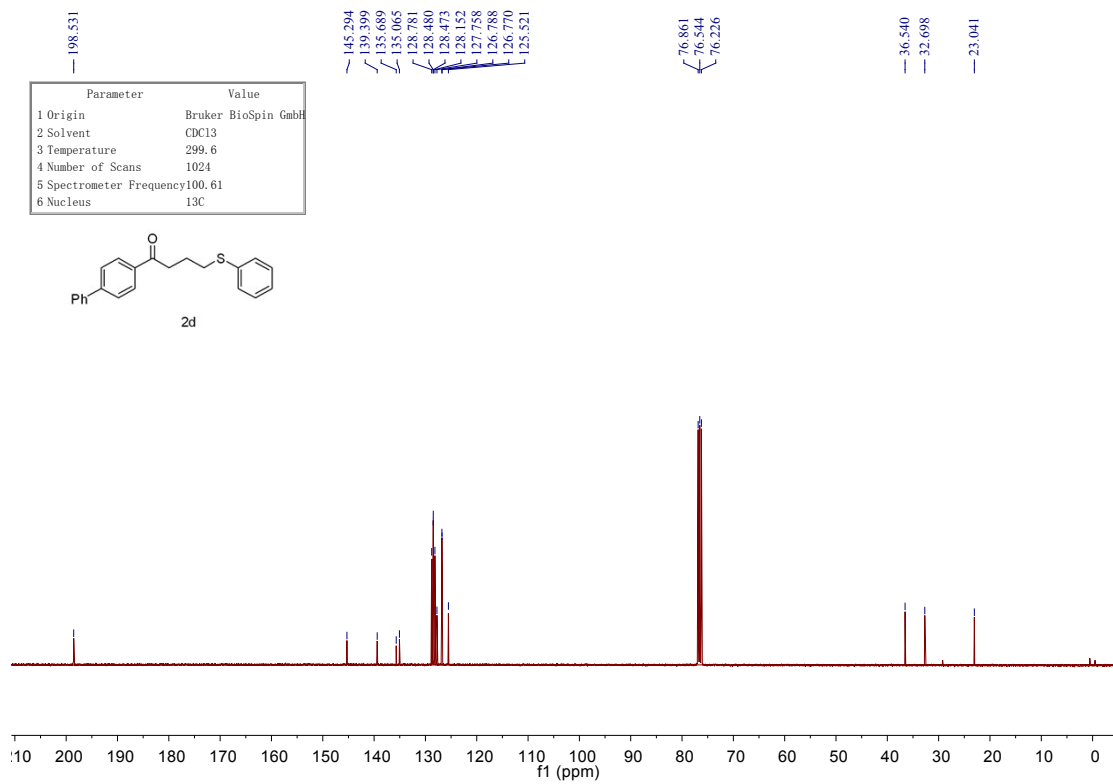

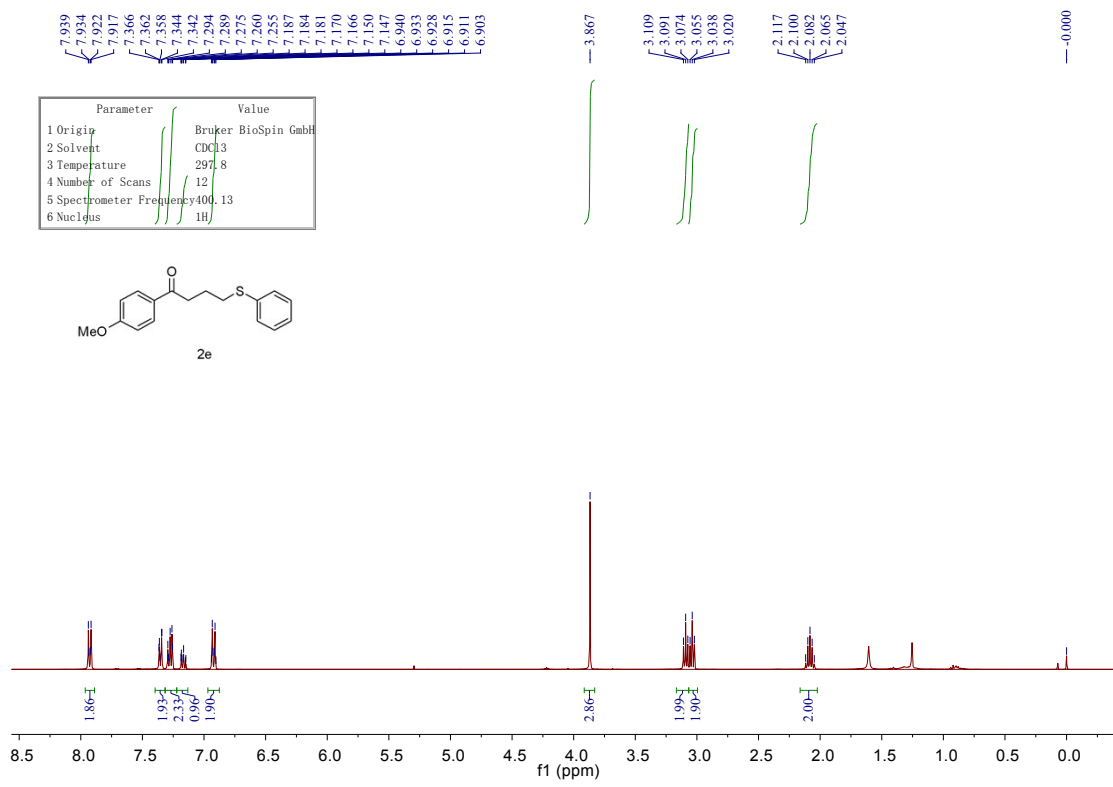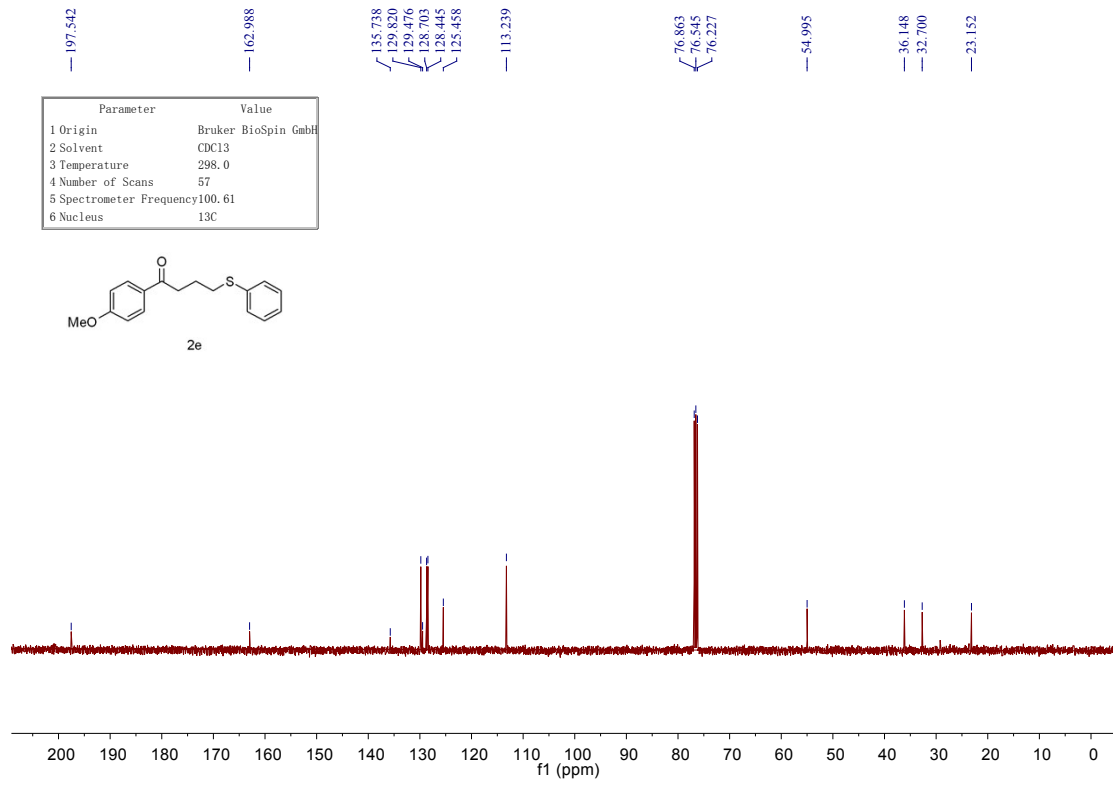

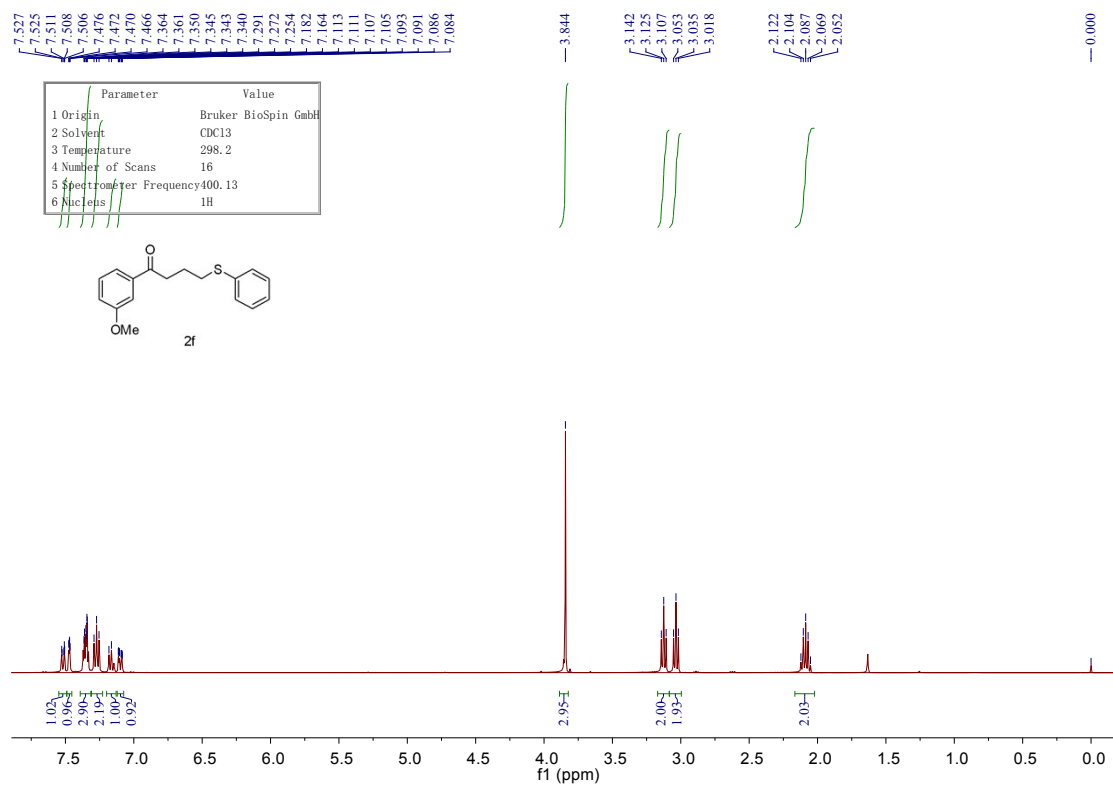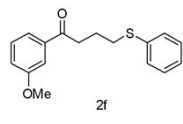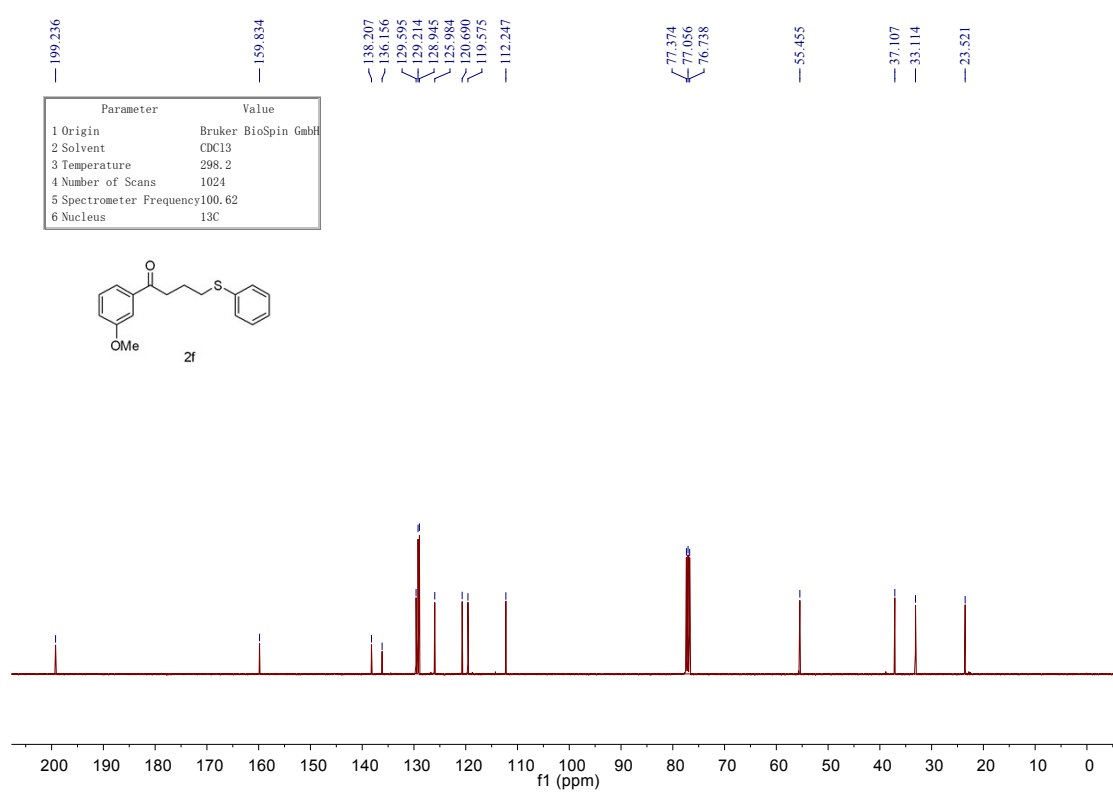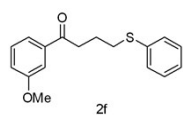

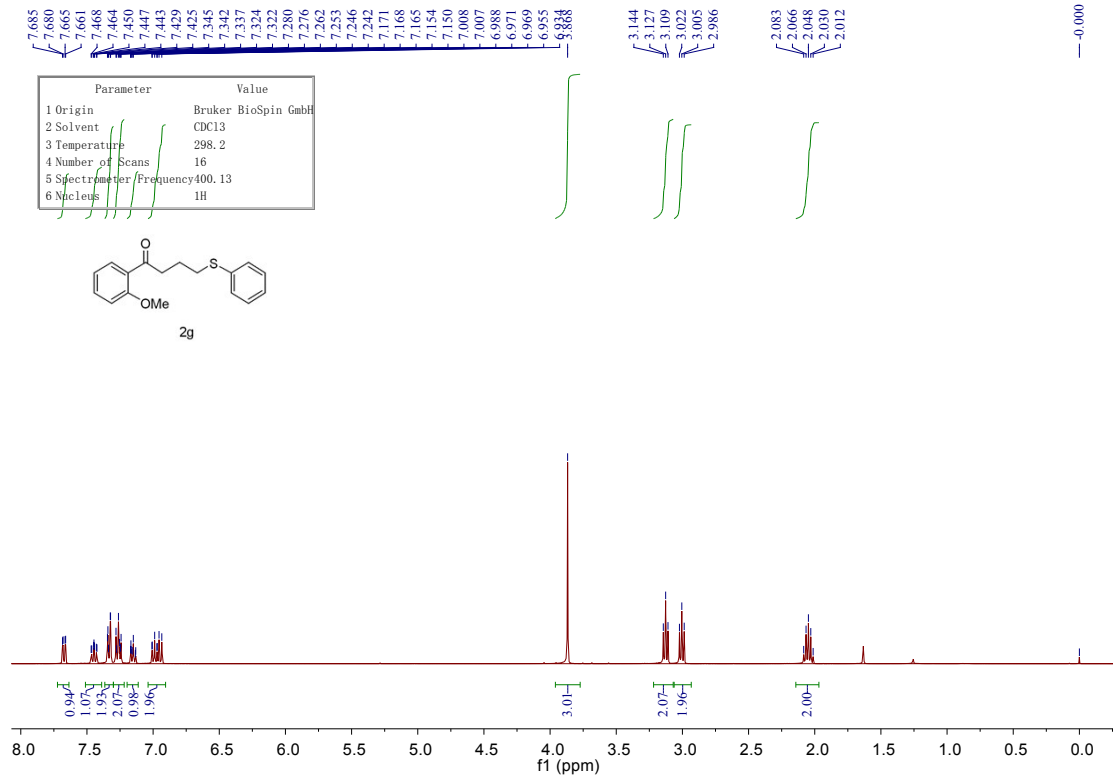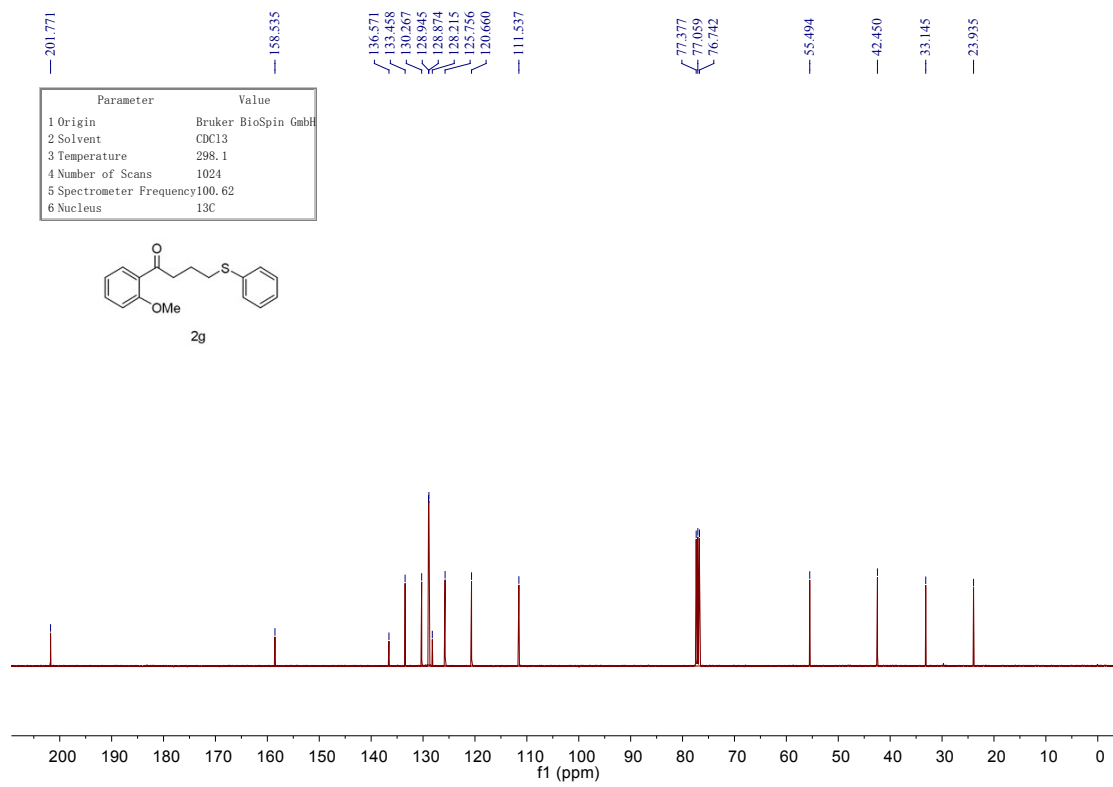



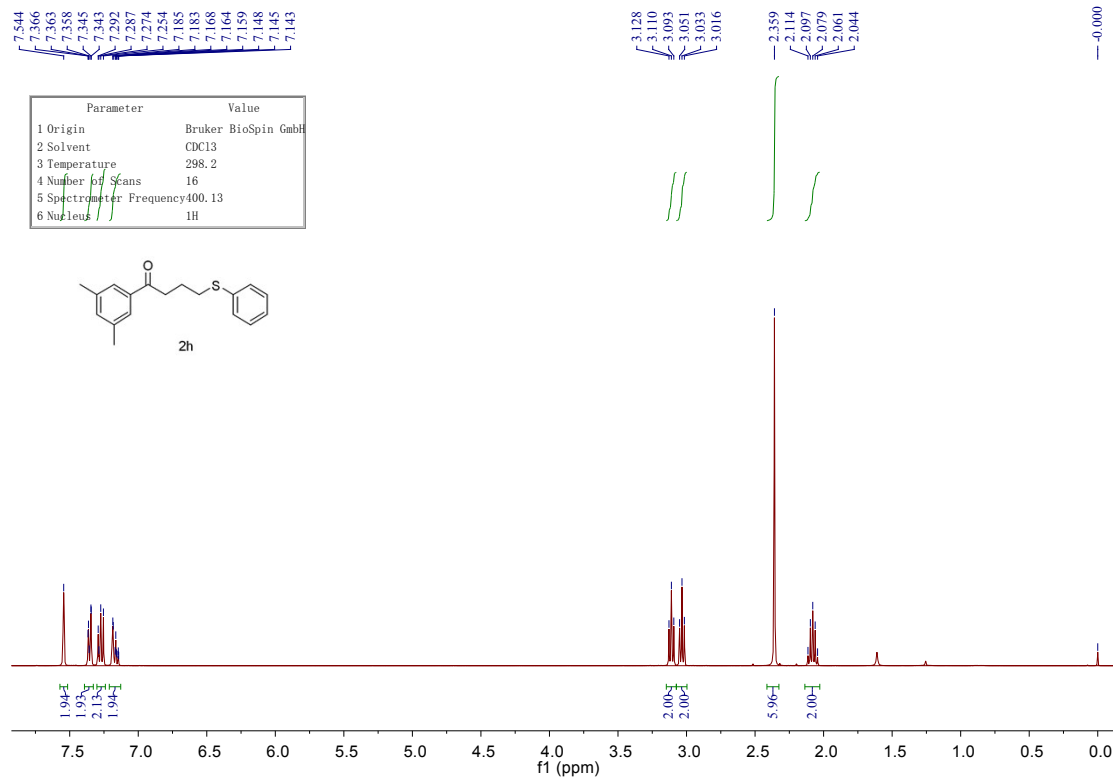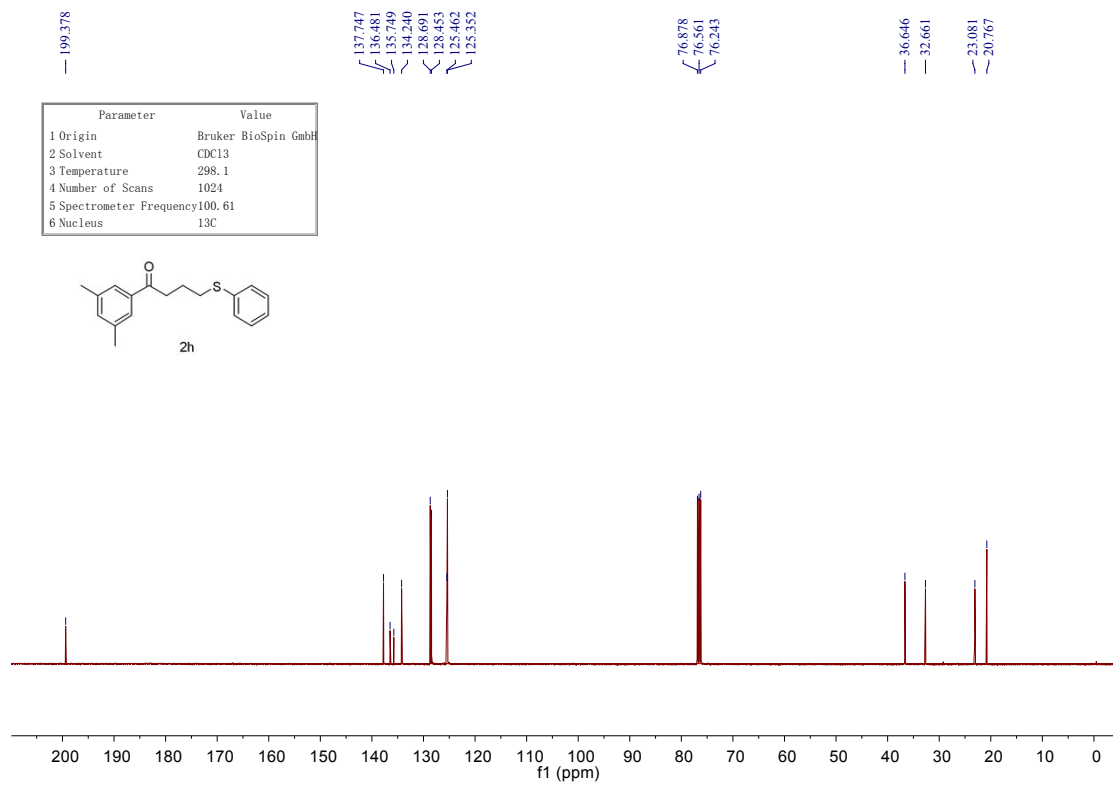

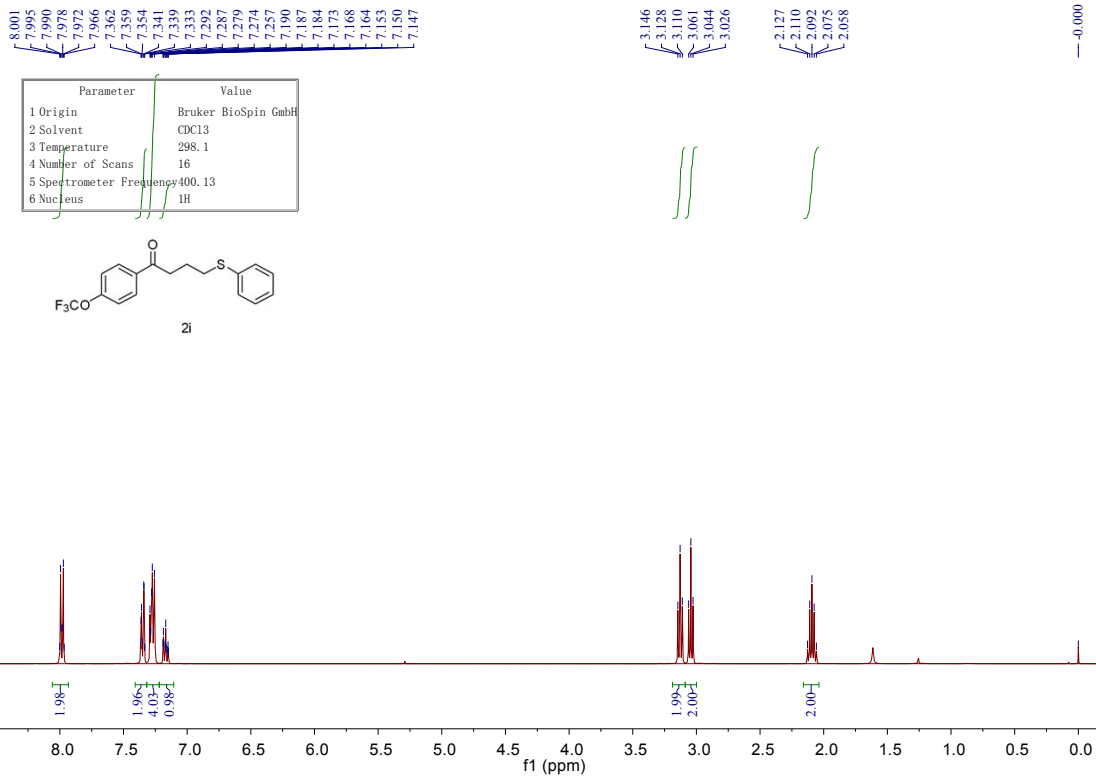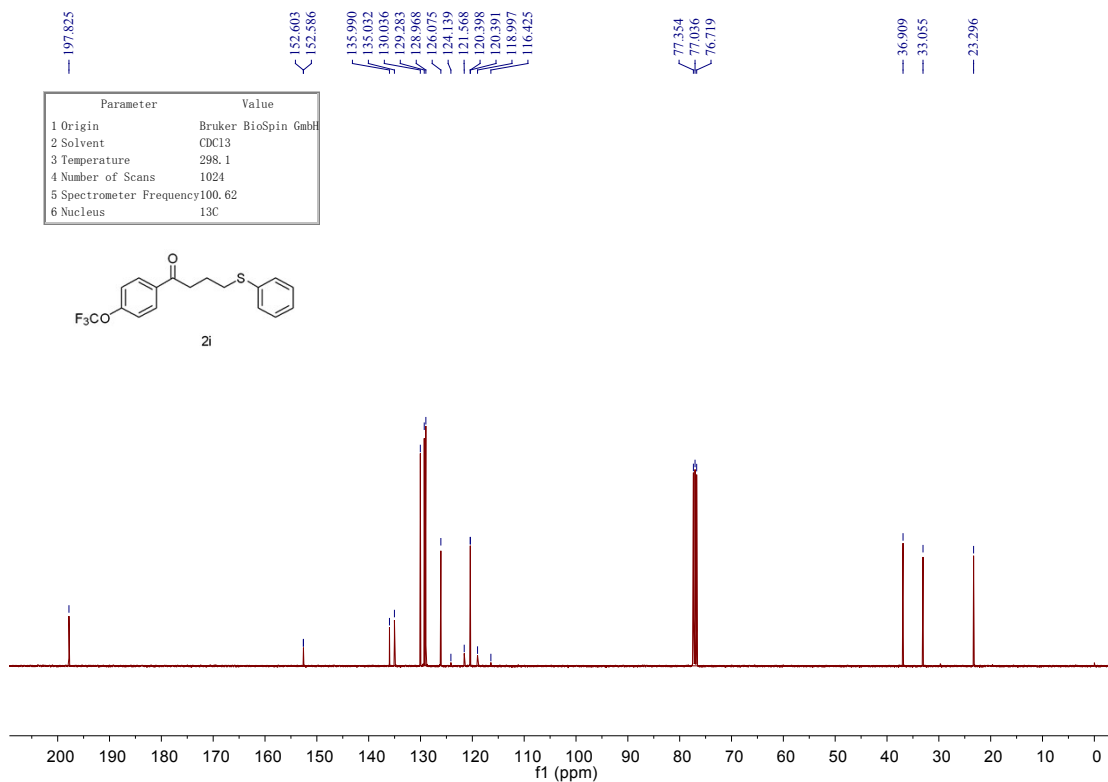

| Parameter                | Value               |
|--------------------------|---------------------|
| 1 Origin                 | Bruker BioSpin GmbH |
| 2 Solvent                | CDCl3               |
| 3 Temperature            | 298.1               |
| 4 Number of Scans        | 16                  |
| 5 Spectrometer Frequency | 376.44              |
| 6 Nucleus                | 19F                 |

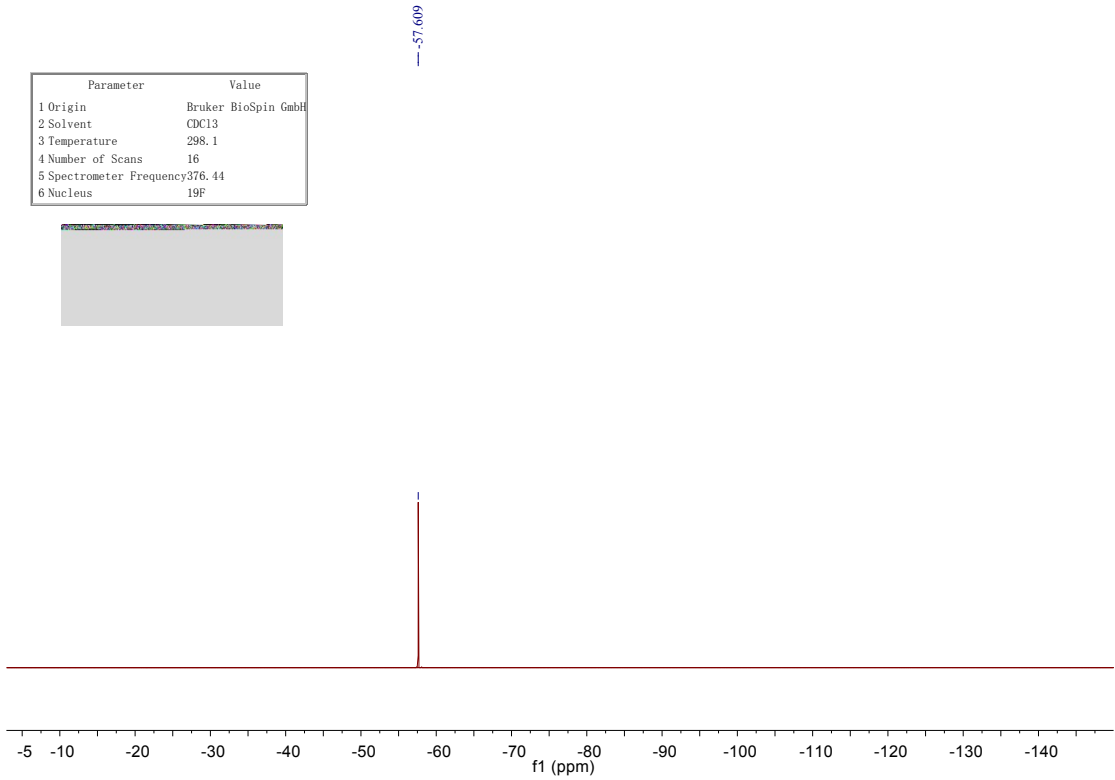

7.901  
7.888  
7.879  
7.866  
7.282  
7.279  
7.261  
7.259  
7.214  
7.209  
7.195  
7.177  
7.108  
7.089  
7.071  
7.063  
7.056  
7.051  
7.034  
7.017  
7.012  
7.005

3.052  
3.034  
3.017  
2.978  
2.961  
2.944

2.041  
2.024  
2.006  
1.989  
1.971

-0.000

| Parameter                | Value               |
|--------------------------|---------------------|
| 1 Origin                 | Bruker BioSpin GmbH |
| 2 Solvent                | CDCl3               |
| 3 Temperature            | 297.8               |
| 4 Number of Scans        | 2                   |
| 5 Spectrometer Frequency | 400.13              |
| 6 Nucleus                | 1H                  |

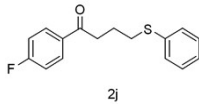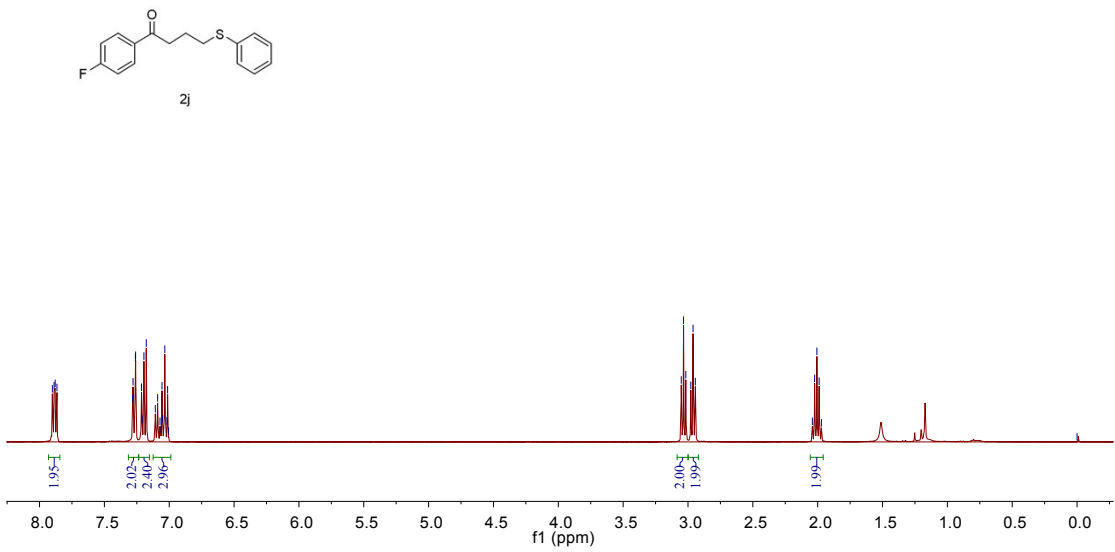

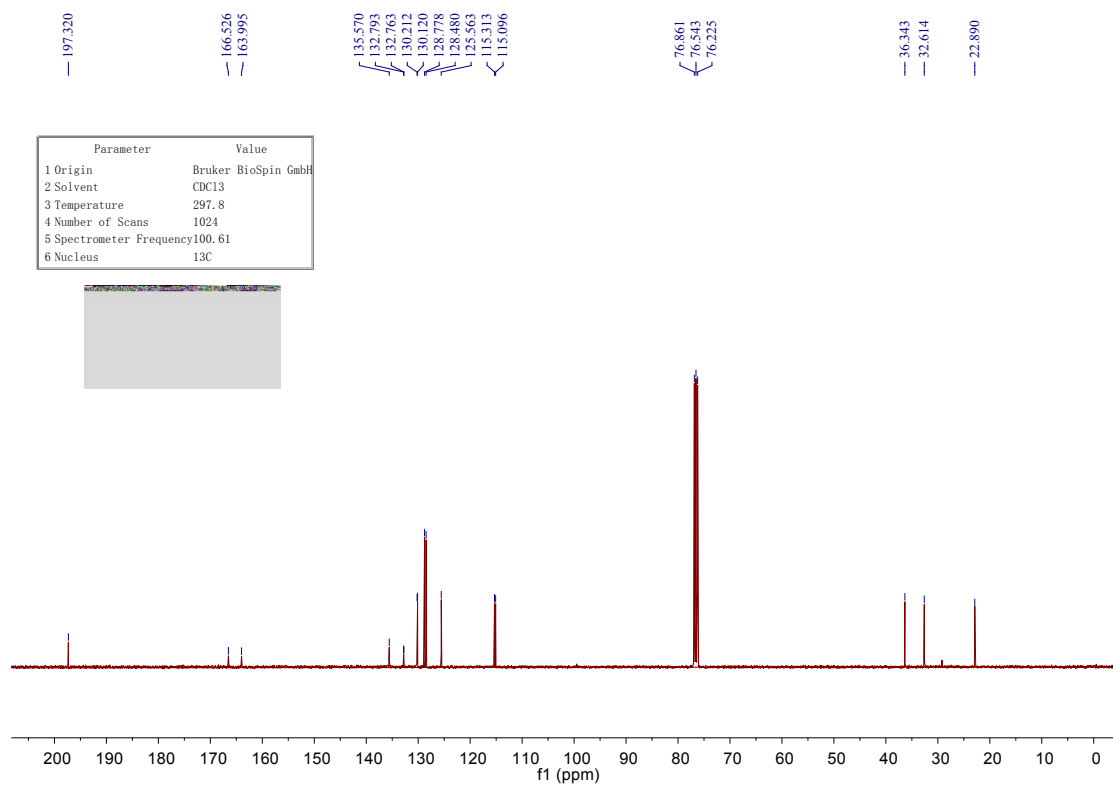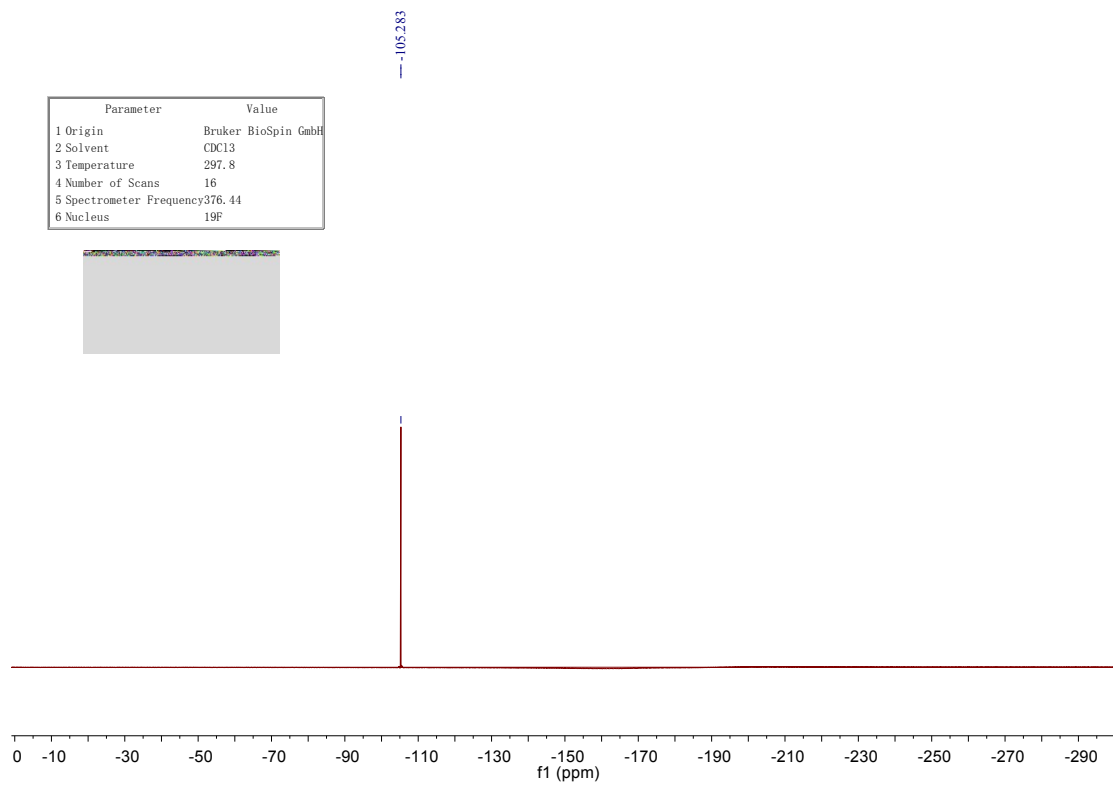

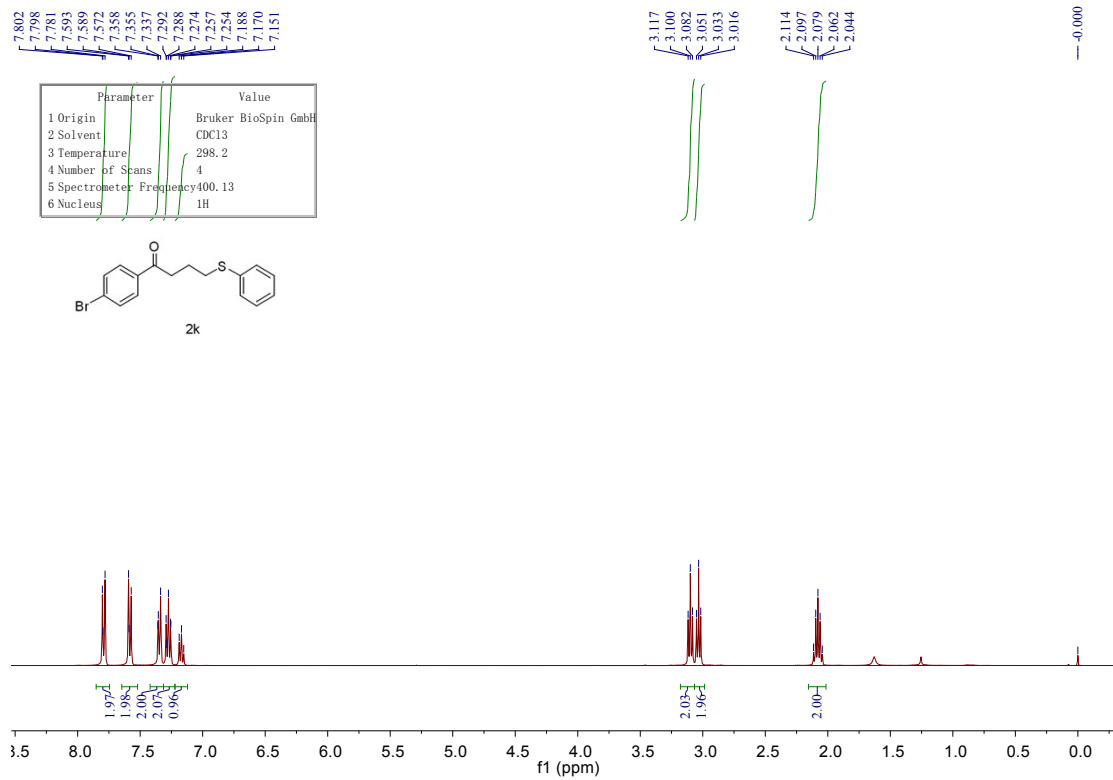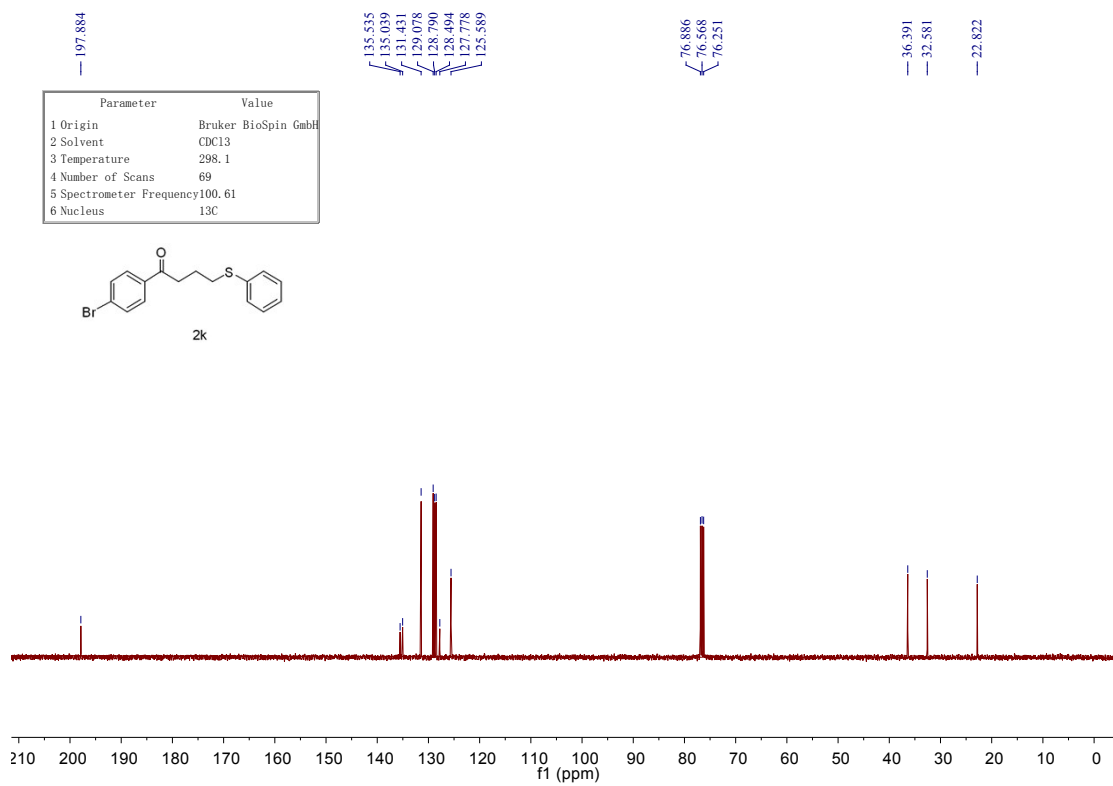

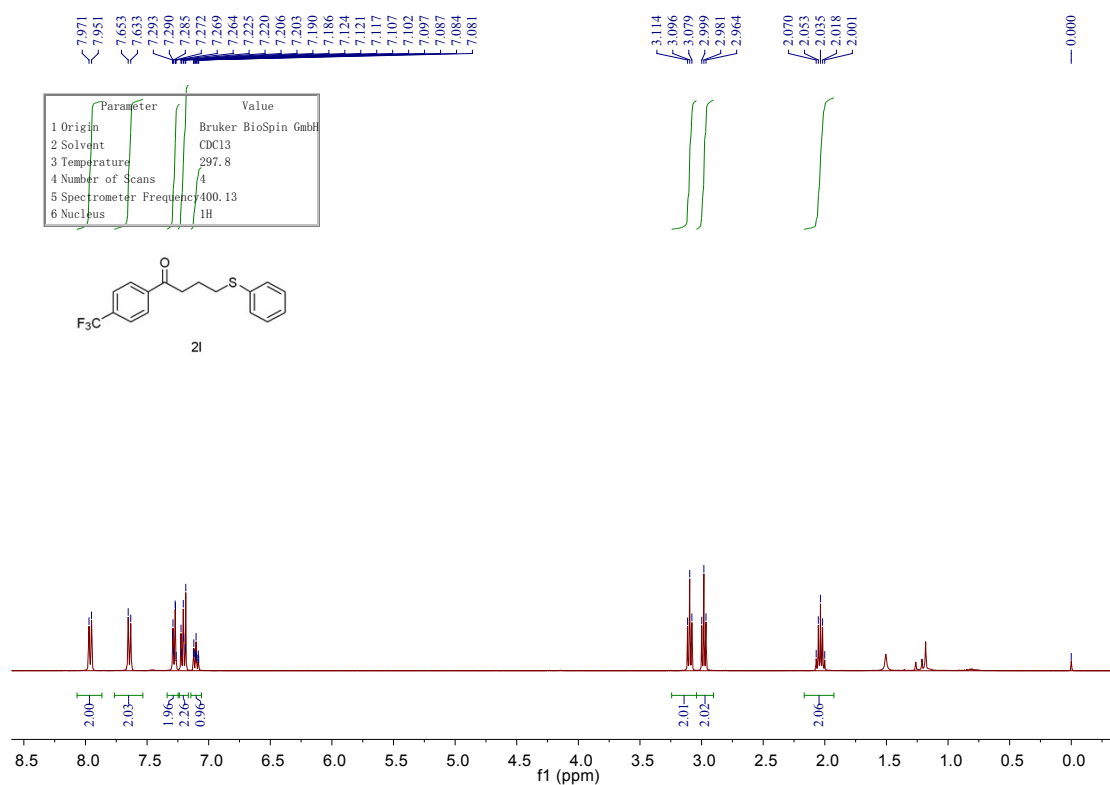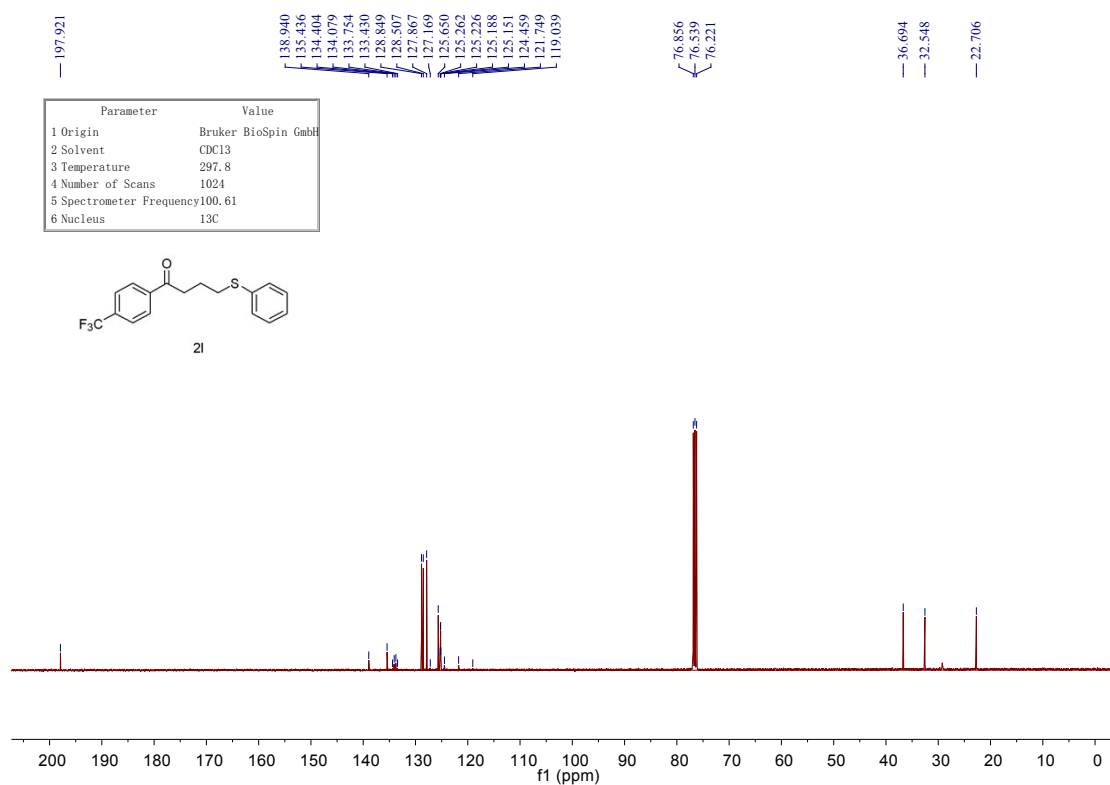

| Parameter                | Value               |
|--------------------------|---------------------|
| 1 Origin                 | Bruker BioSpin GmbH |
| 2 Solvent                | CDCl3               |
| 3 Temperature            | 297.8               |
| 4 Number of Scans        | 16                  |
| 5 Spectrometer Frequency | 376.44              |
| 6 Nucleus                | 19F                 |

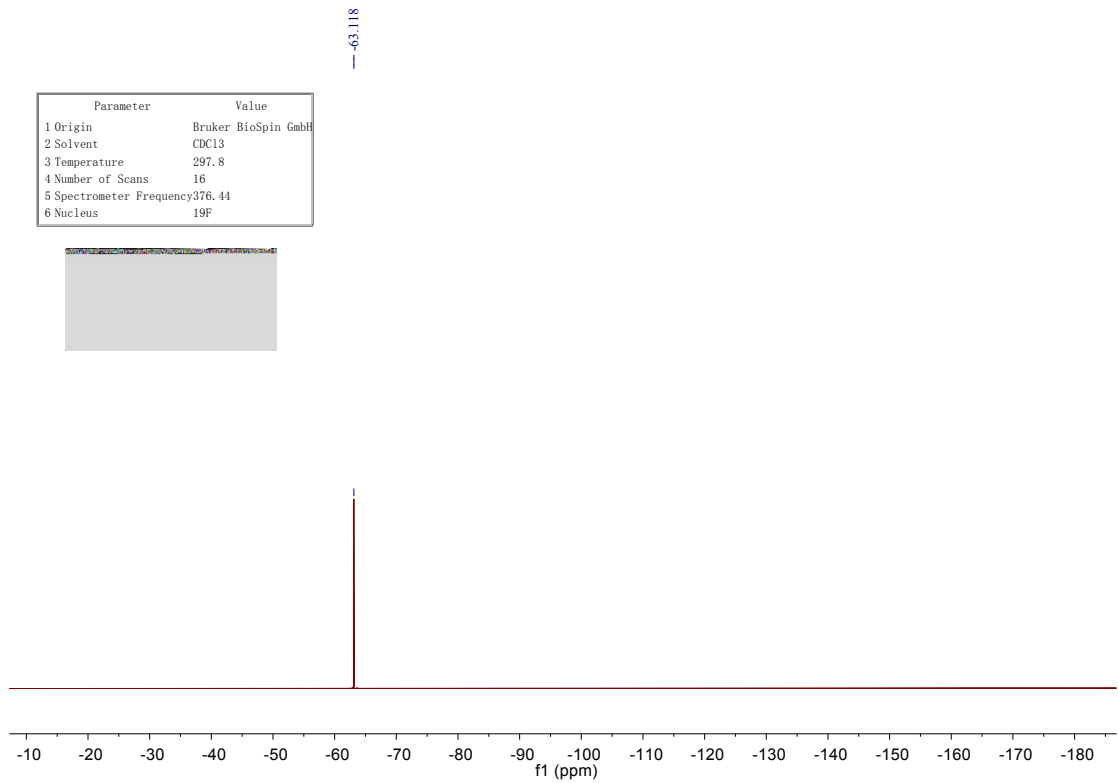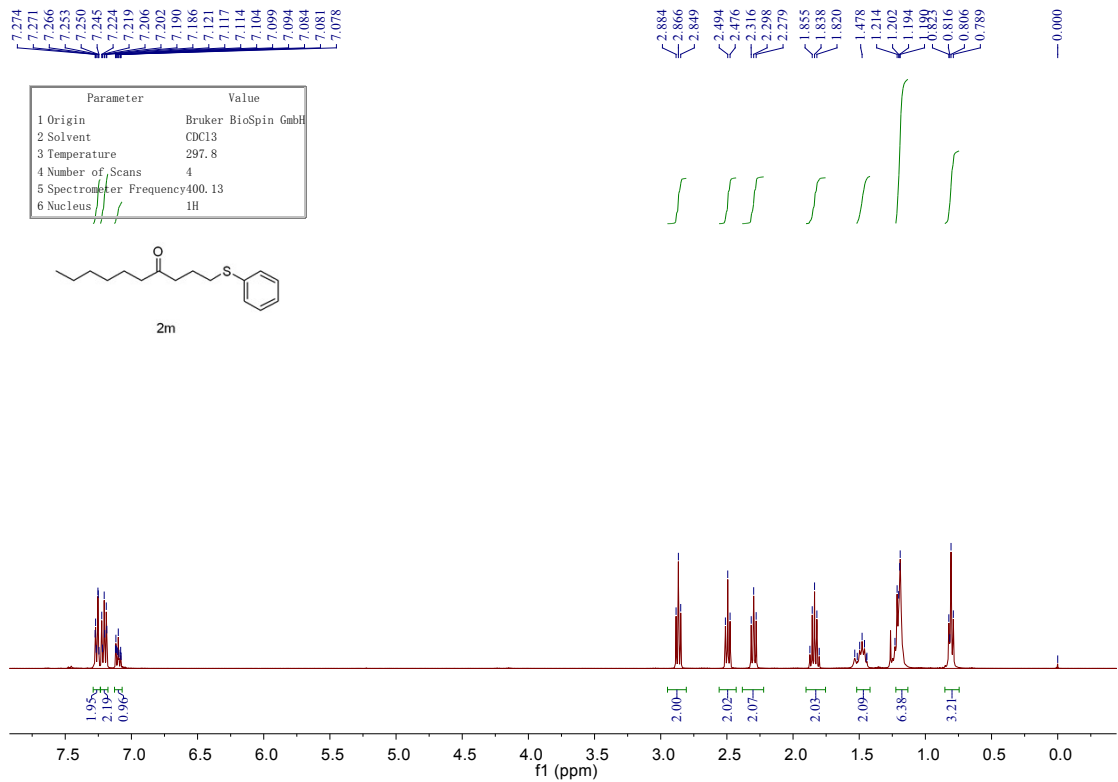

210.033

| Parameter                | Value               |
|--------------------------|---------------------|
| 1 Origin                 | Bruker BioSpin GmbH |
| 2 Solvent                | CDCl3               |
| 3 Temperature            | 297.8               |
| 4 Number of Scans        | 68                  |
| 5 Spectrometer Frequency | 100.61              |
| 6 Nucleus                | 13C                 |

135.705  
128.723  
128.439  
125.487

76.863  
76.846  
76.228

42.495  
40.424  
32.535  
31.104  
28.418  
23.347  
22.523  
22.005  
13.551

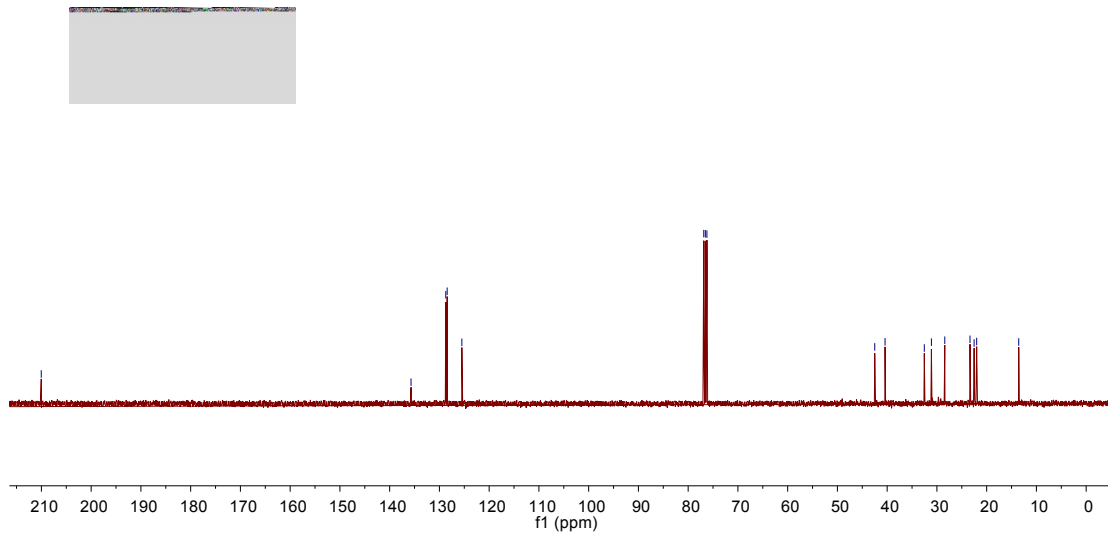

7.272  
7.269  
7.264  
7.251  
7.249  
7.243  
7.222  
7.217  
7.203  
7.200  
7.190  
7.183  
7.117  
7.113  
7.110  
7.100  
7.095  
7.090  
7.077

2.873  
2.856  
2.838  
2.526  
2.509  
2.232  
2.223  
1.845  
1.827  
1.810  
1.730  
1.267  
1.255  
1.230  
1.213  
1.201  
1.183  
1.177  
1.171  
1.165  
1.146  
1.142  
0.000

| Parameter                | Value               |
|--------------------------|---------------------|
| 1 Origin                 | Bruker BioSpin GmbH |
| 2 Solvent                | CDCl3               |
| 3 Temperature            | 297.8               |
| 4 Number of Scans        | 4                   |
| 5 Spectrometer Frequency | 400.13              |
| 6 Nucleus                | 1H                  |

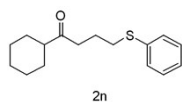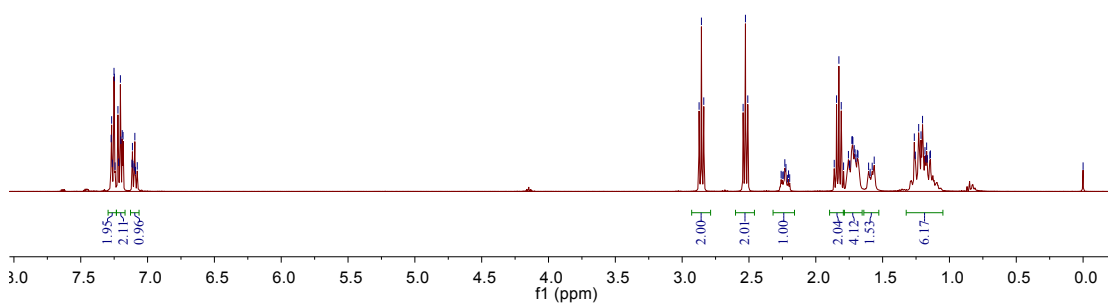



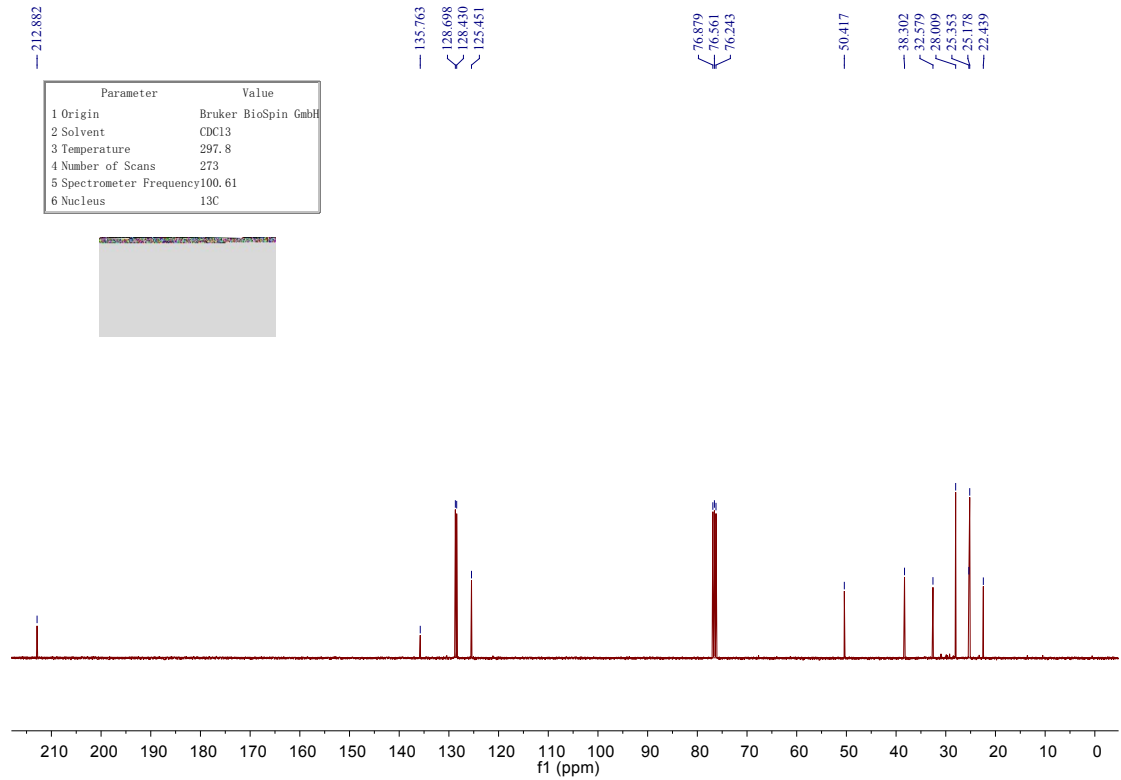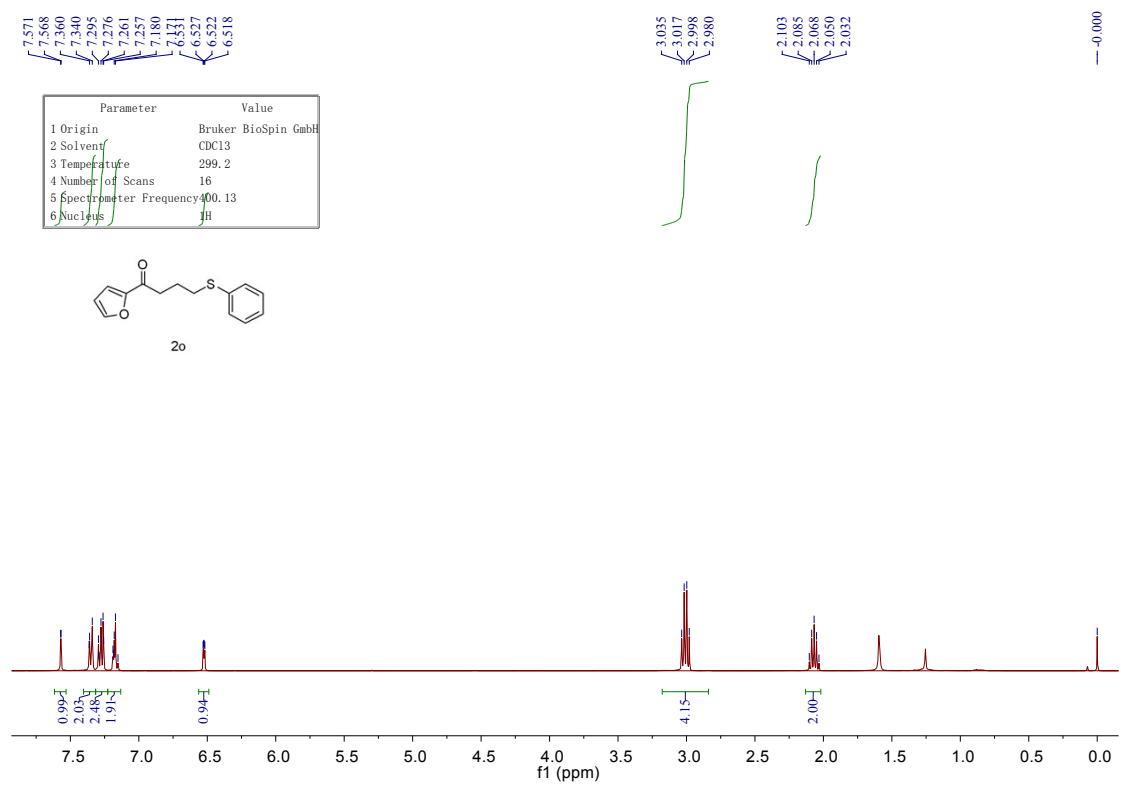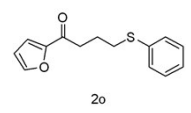

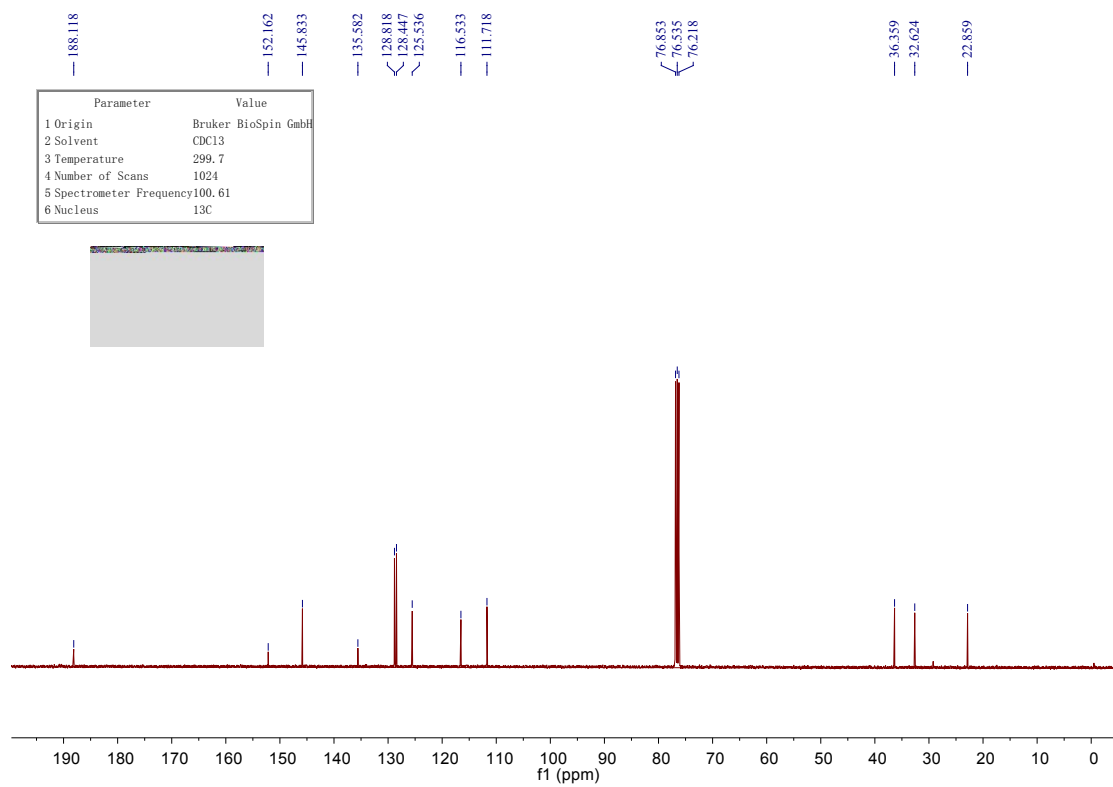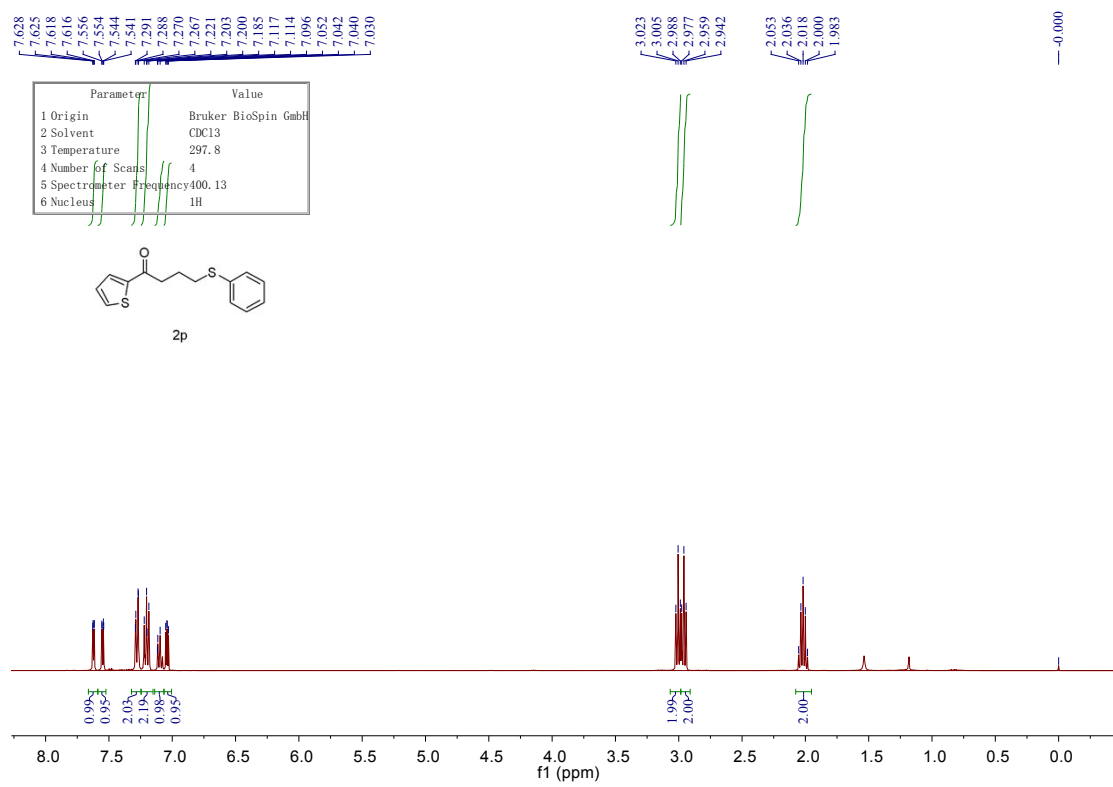

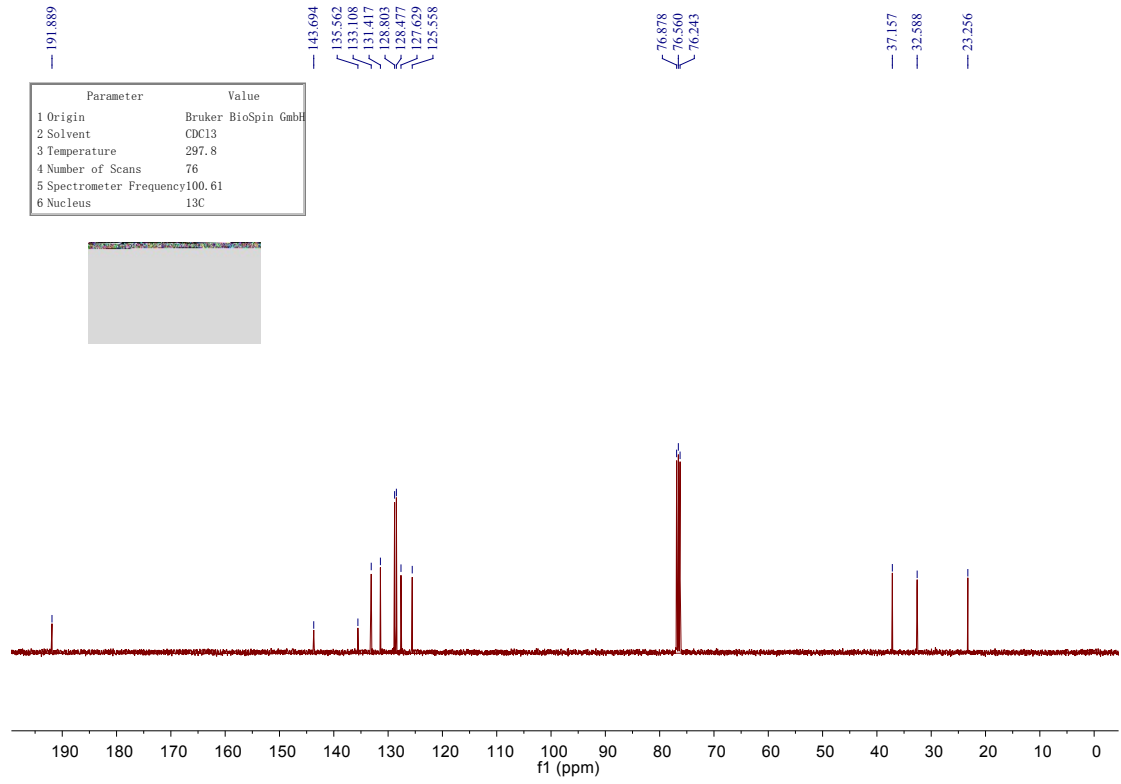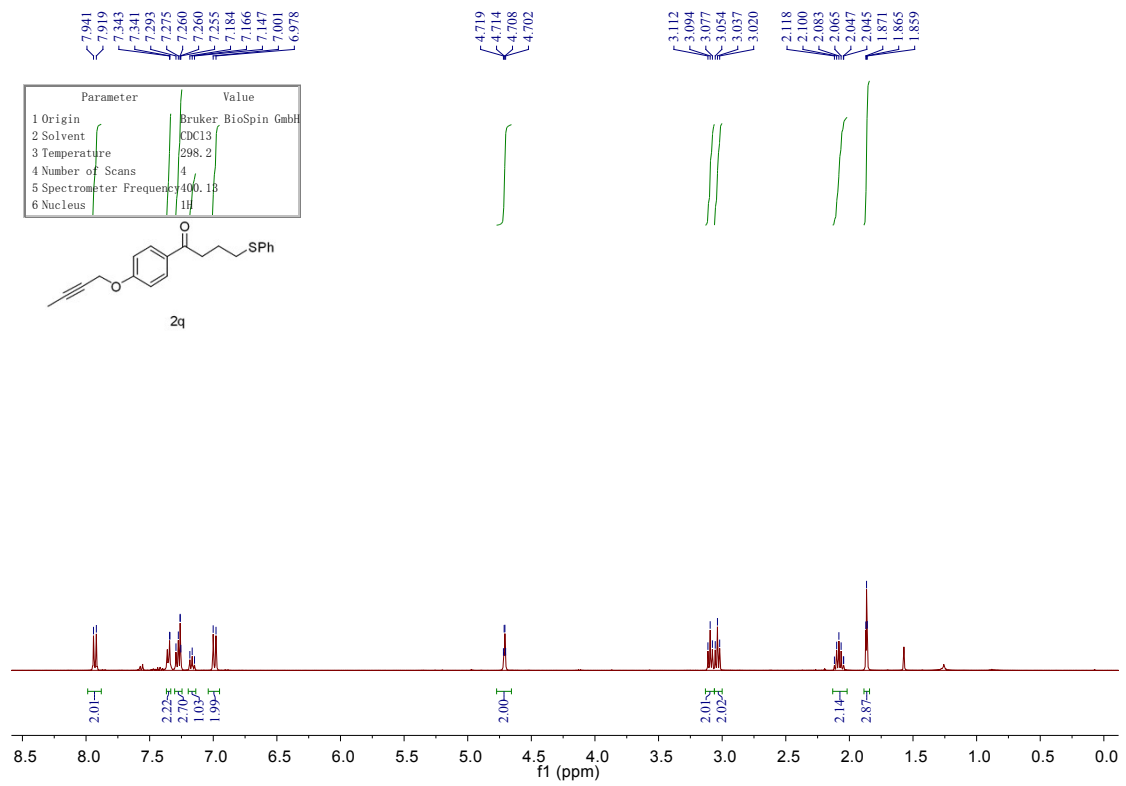

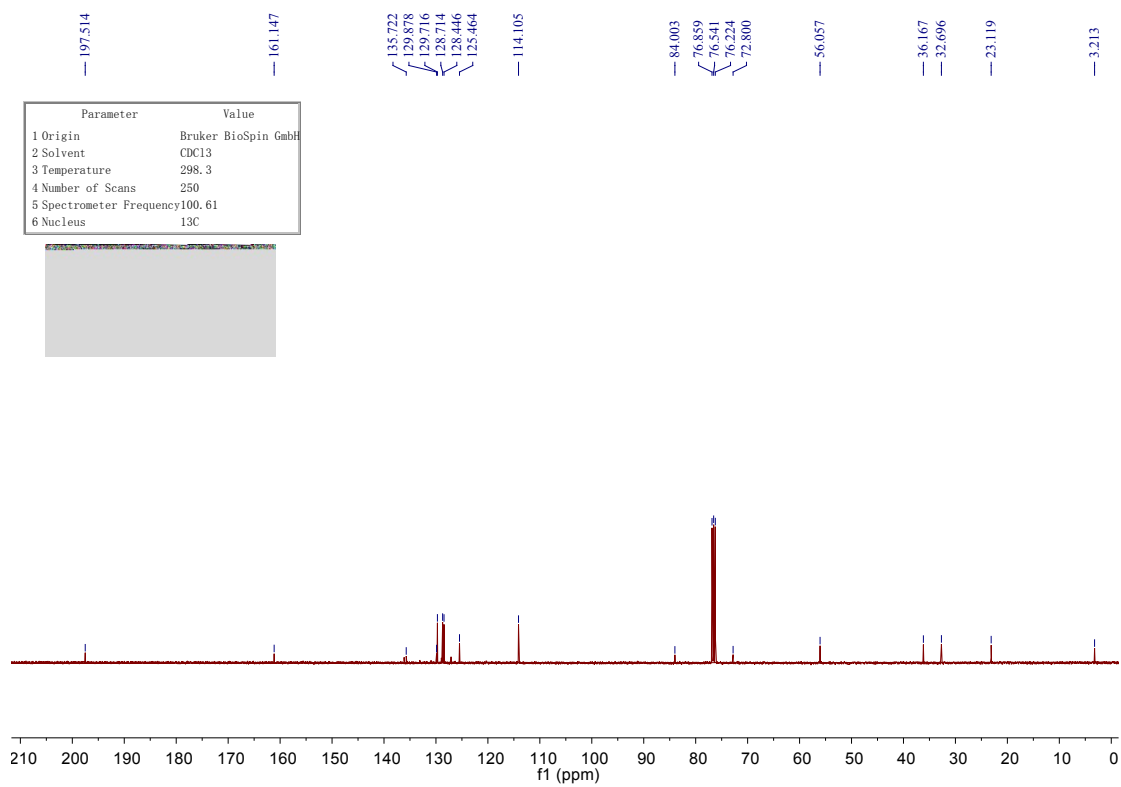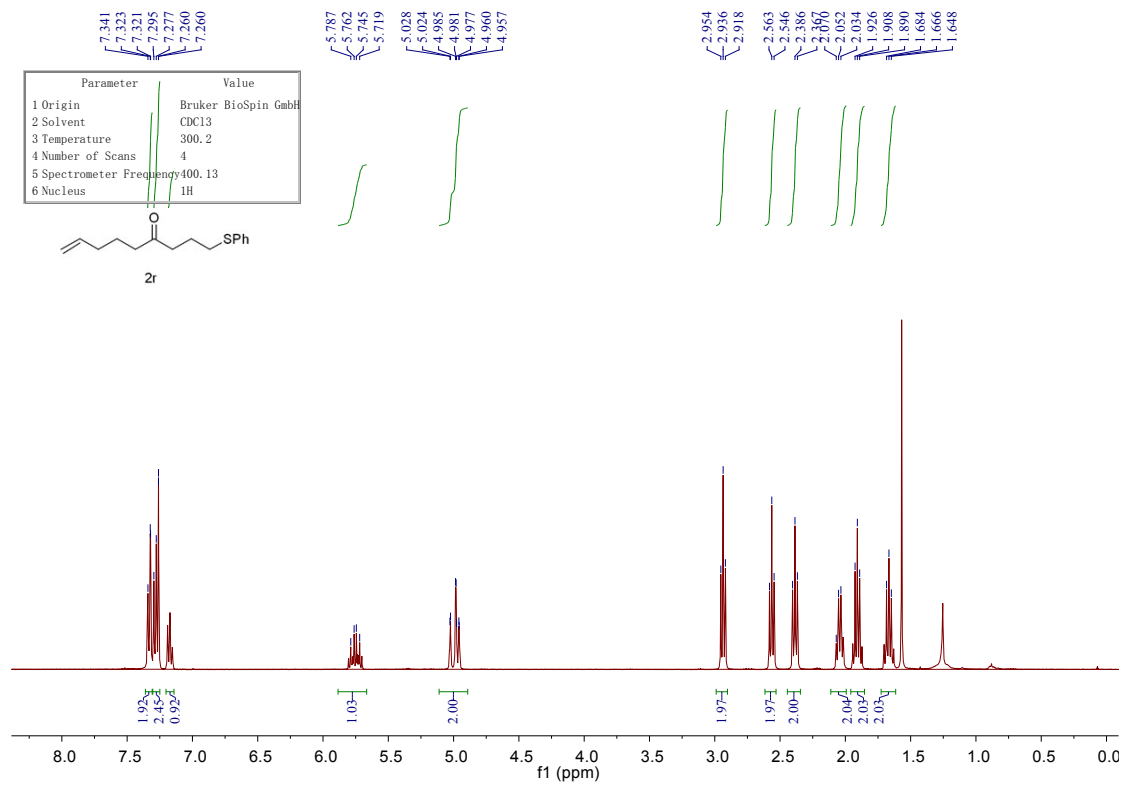

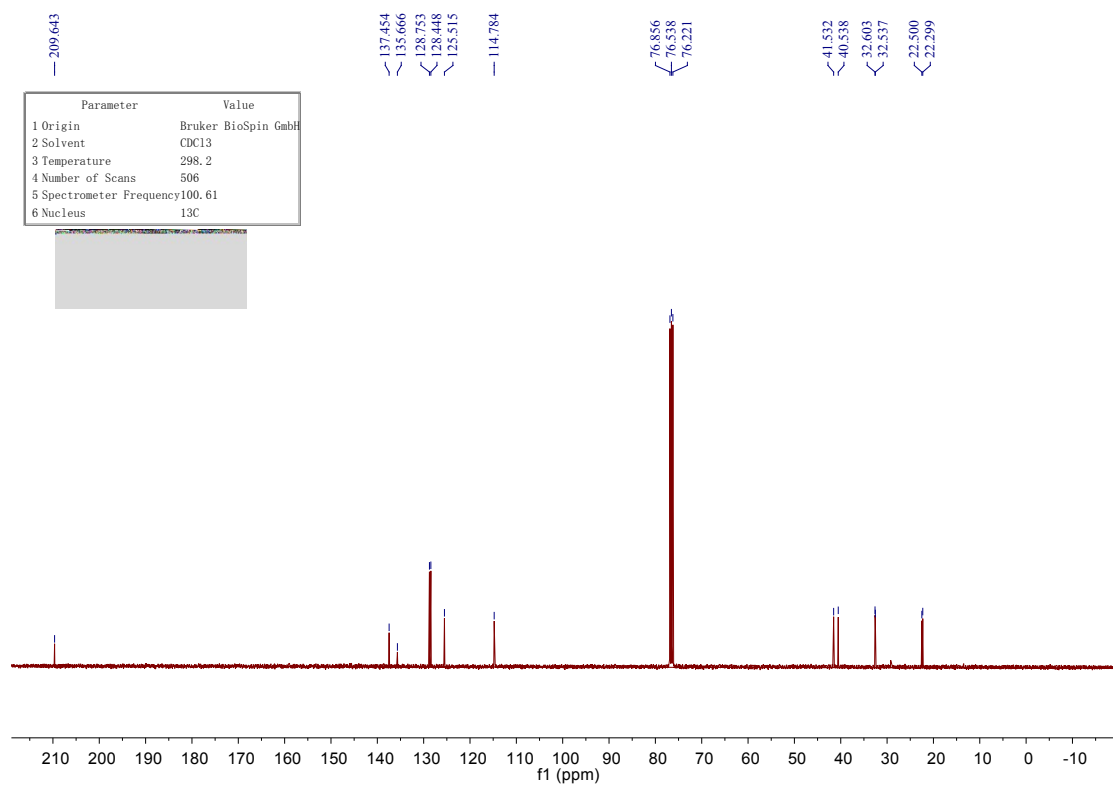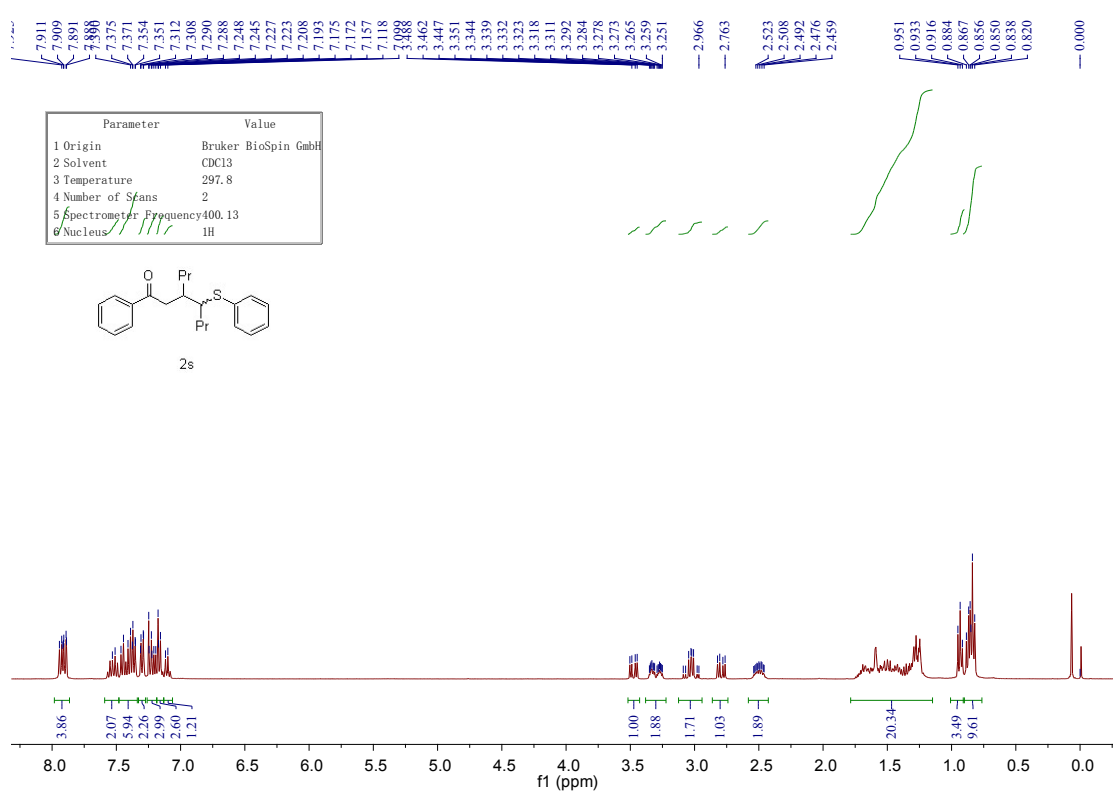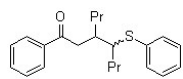

2s

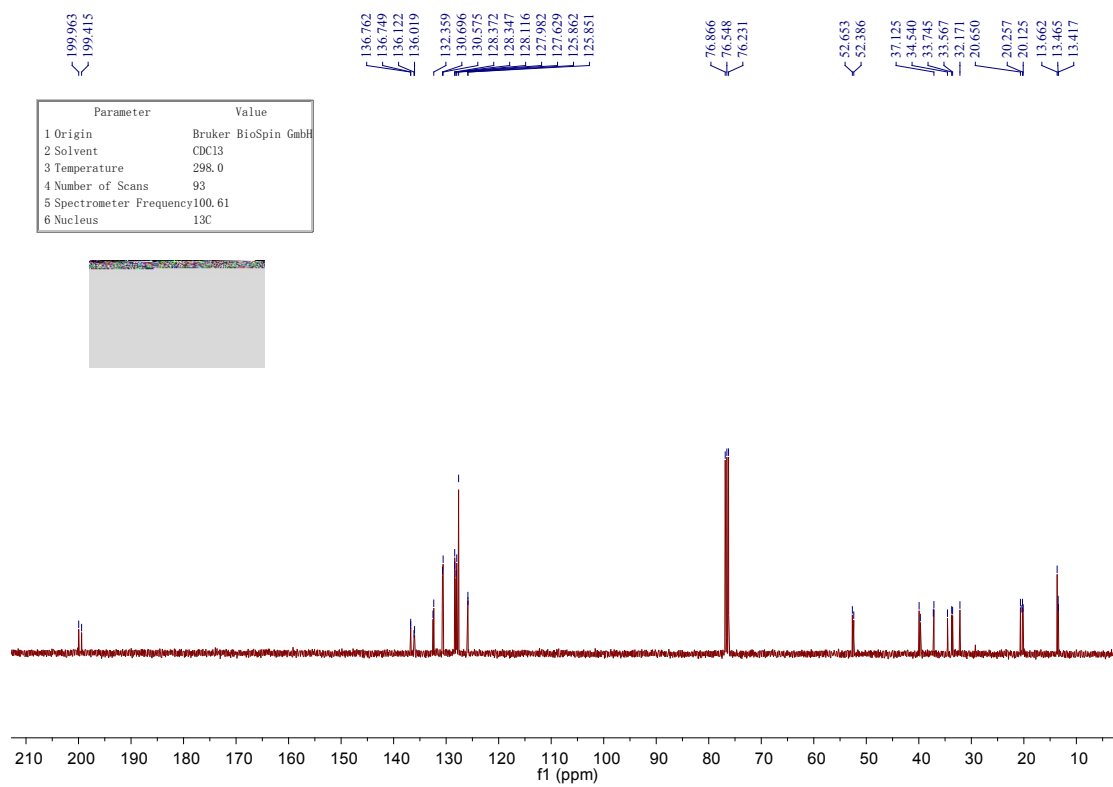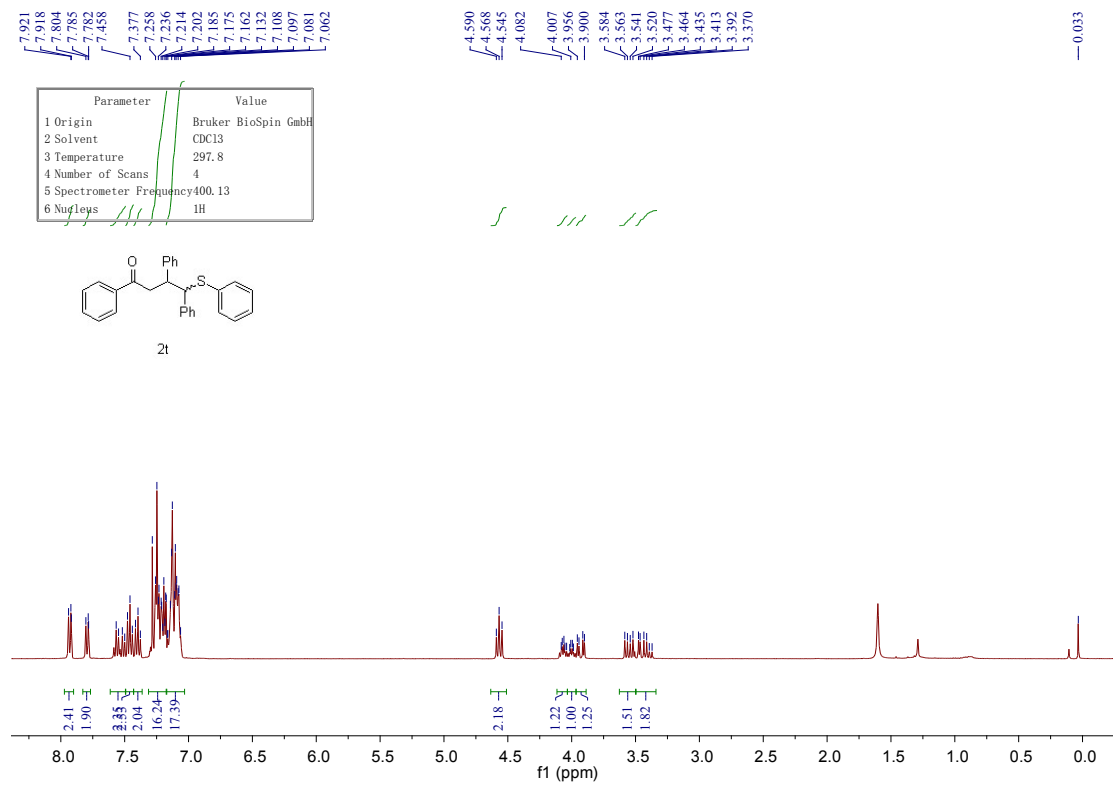

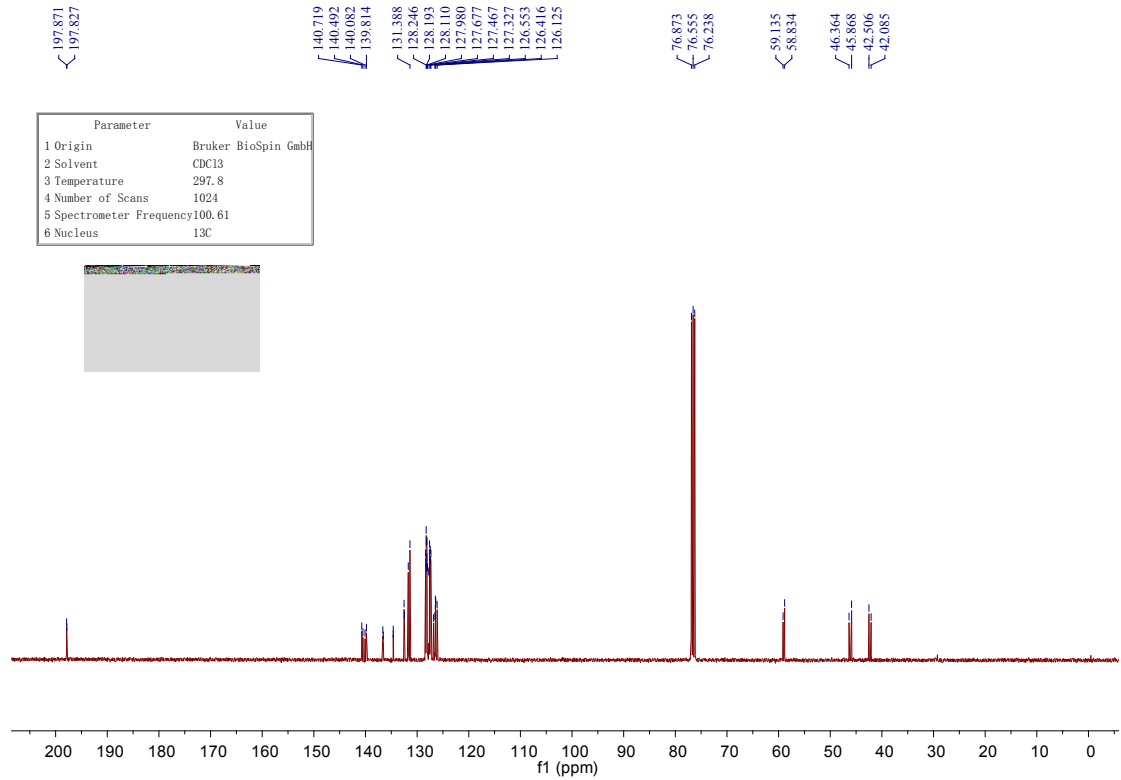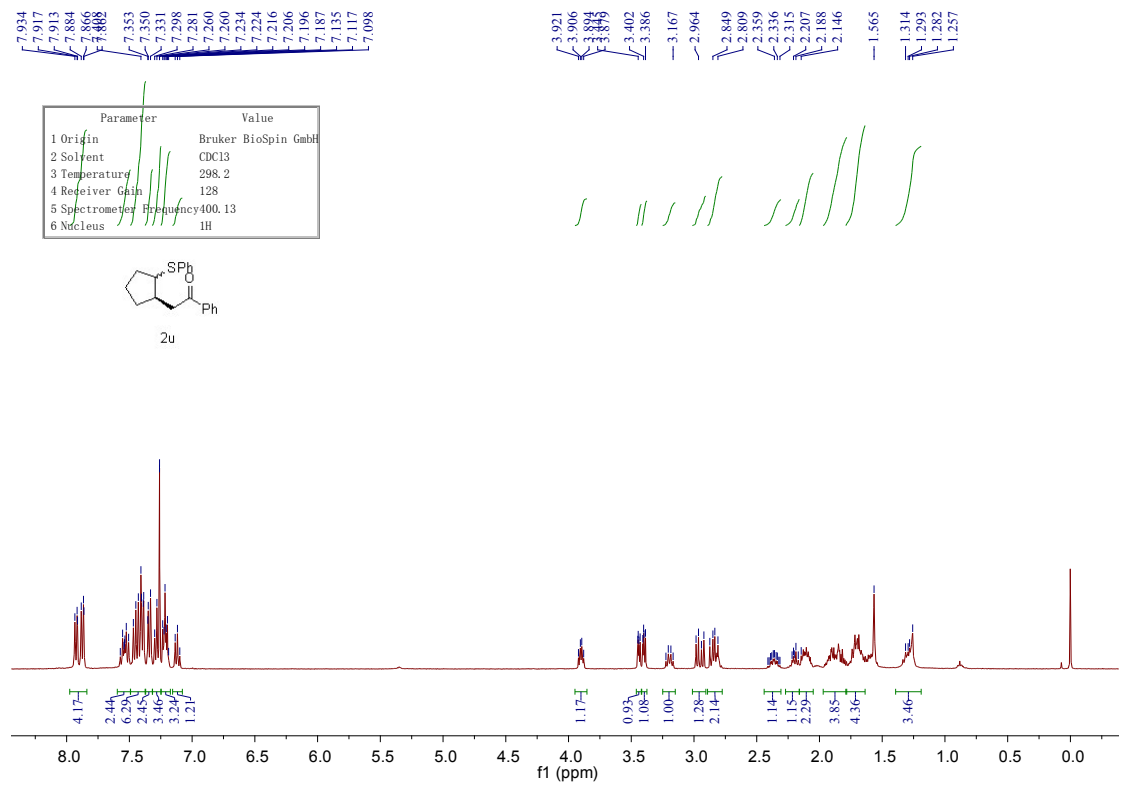

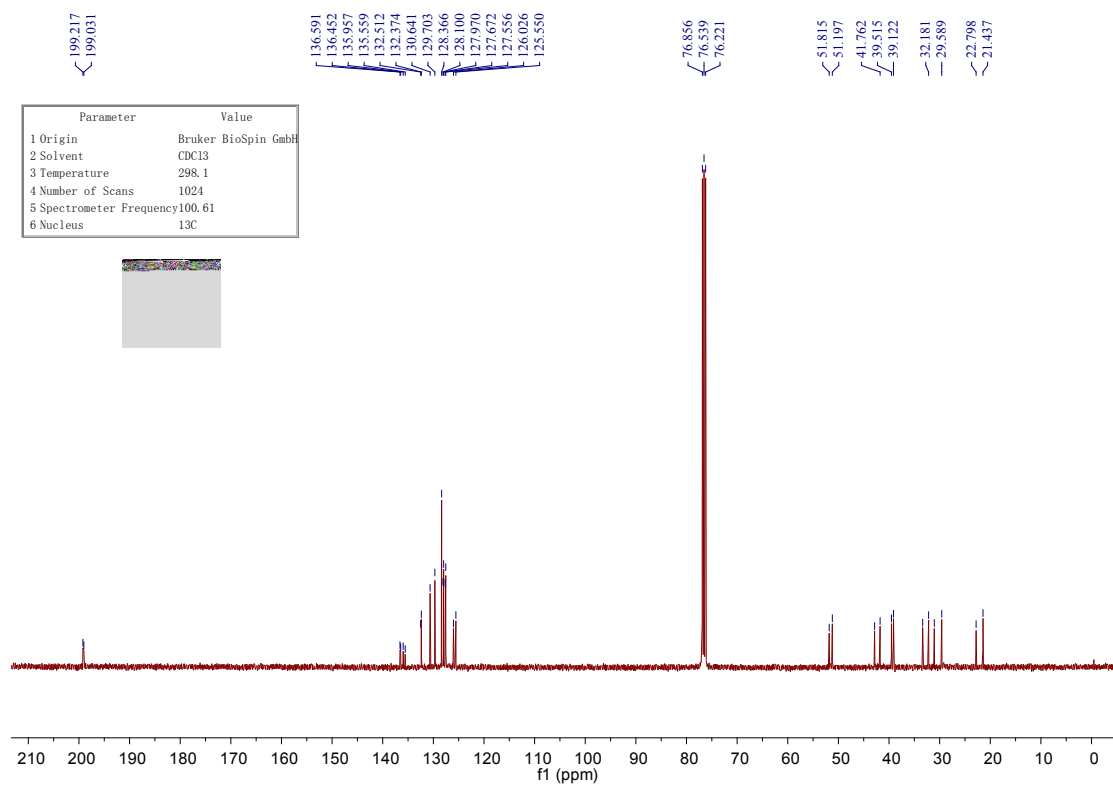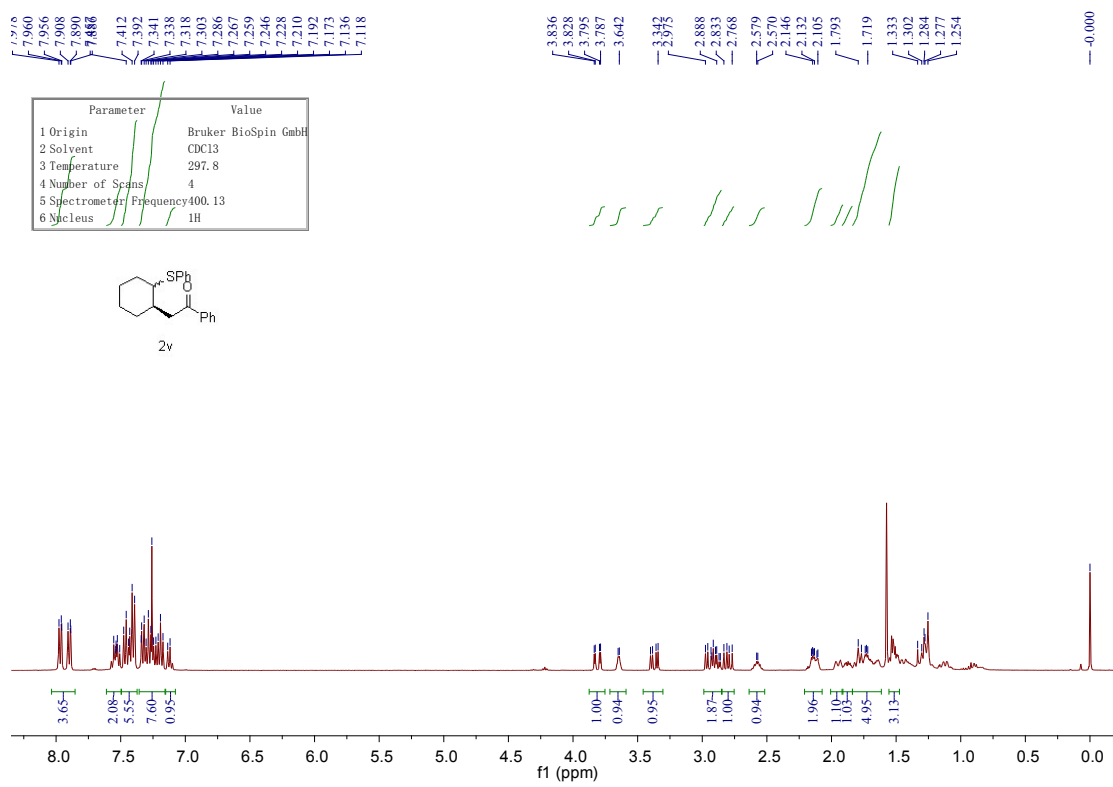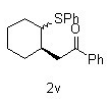



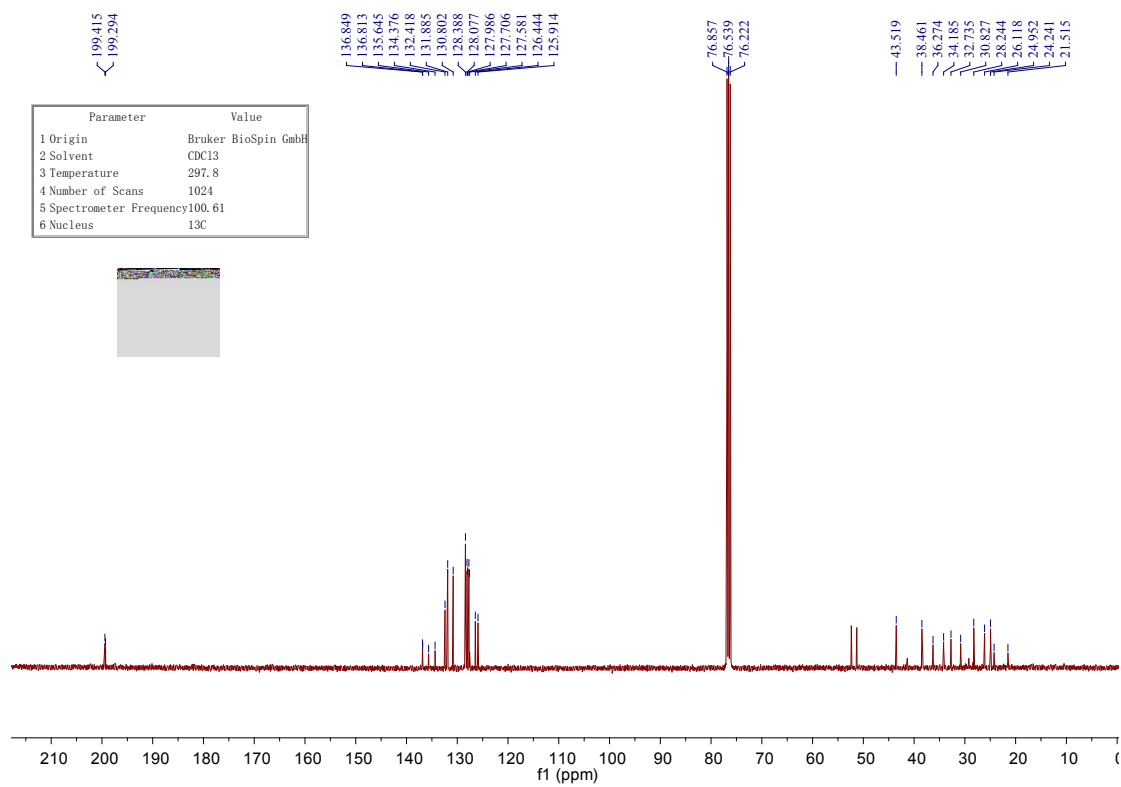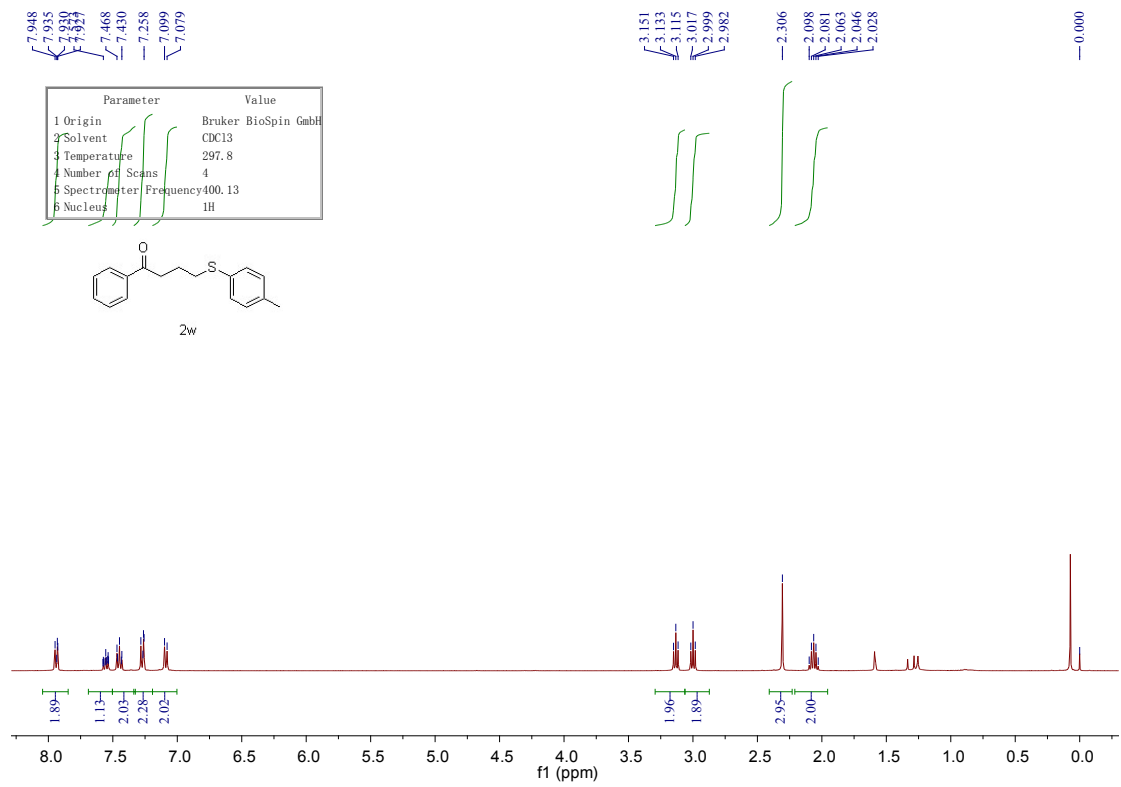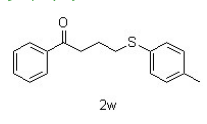

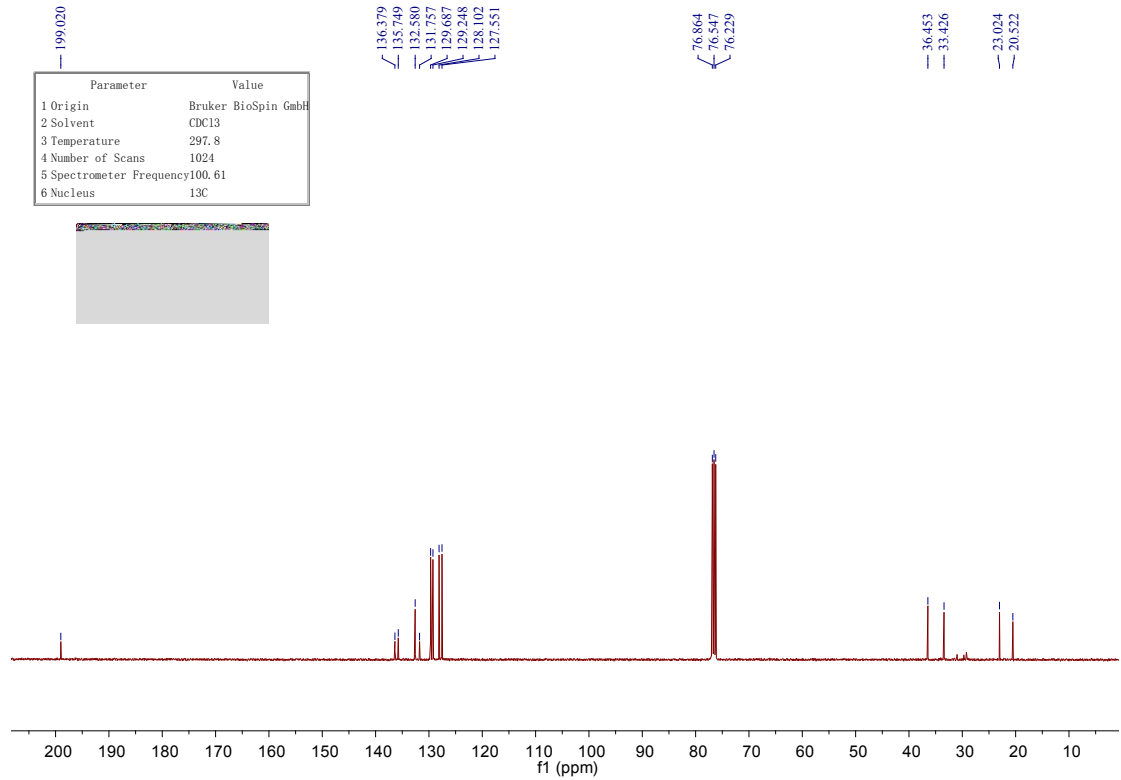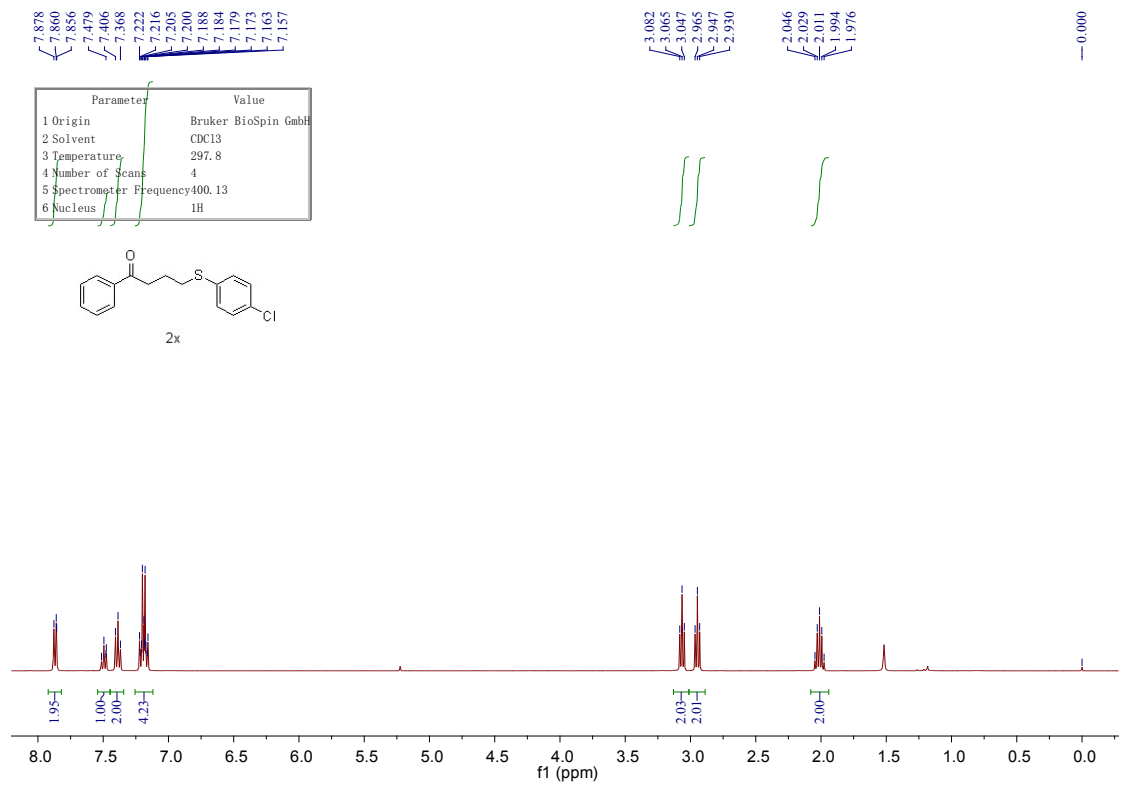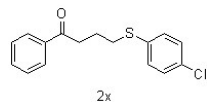

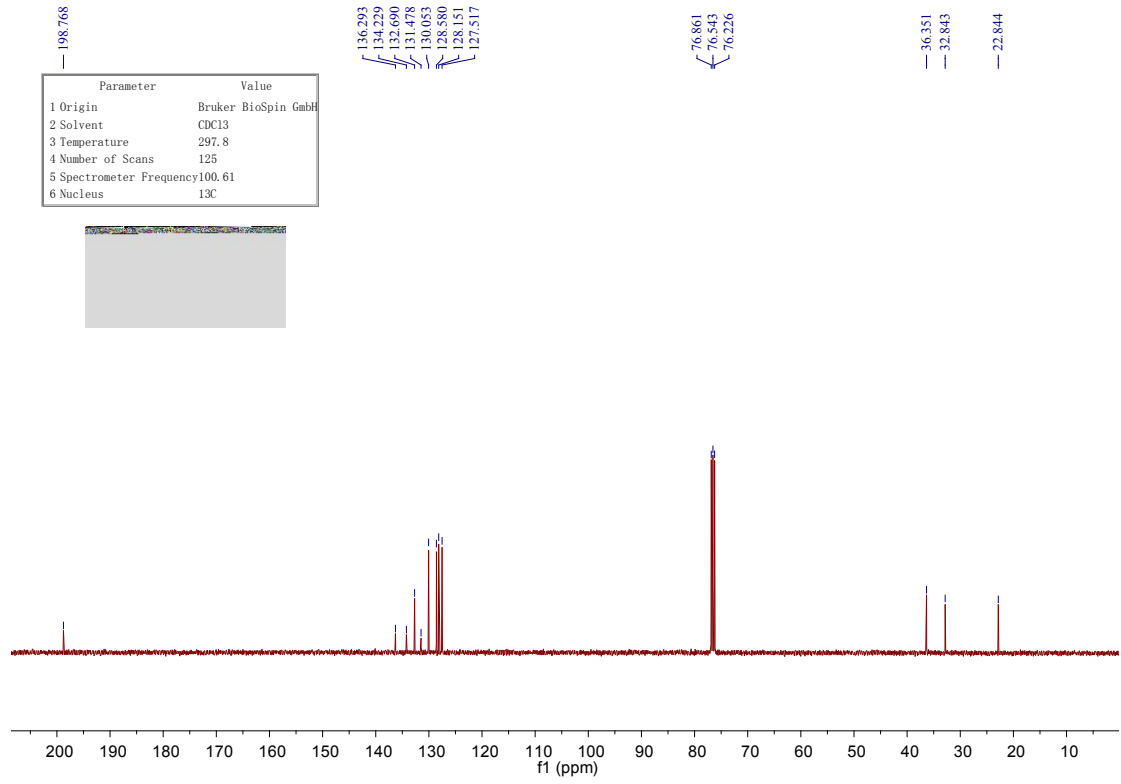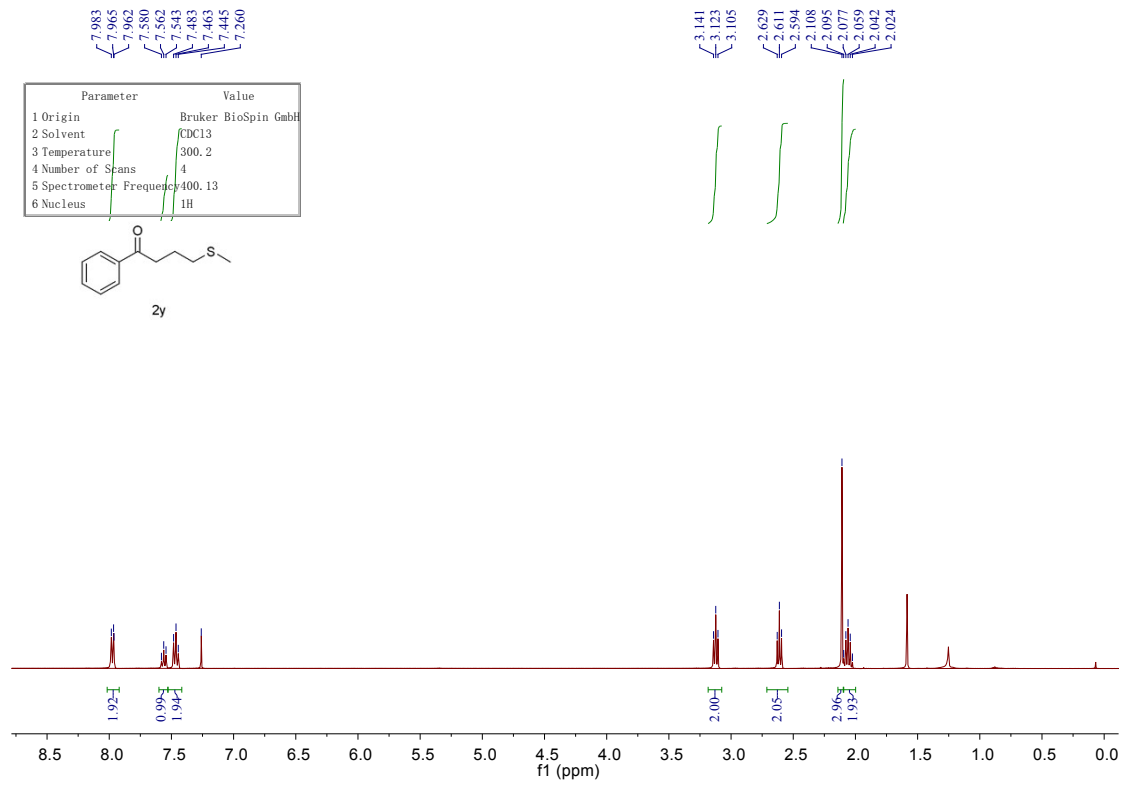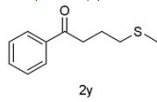

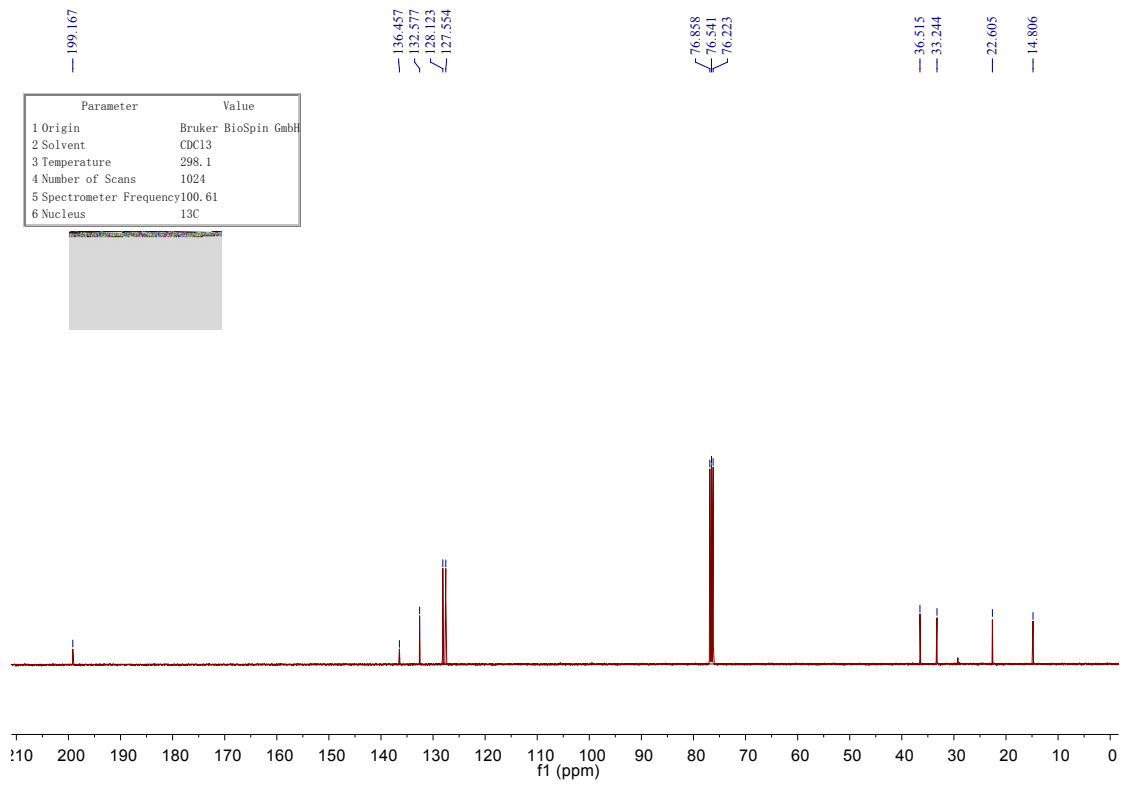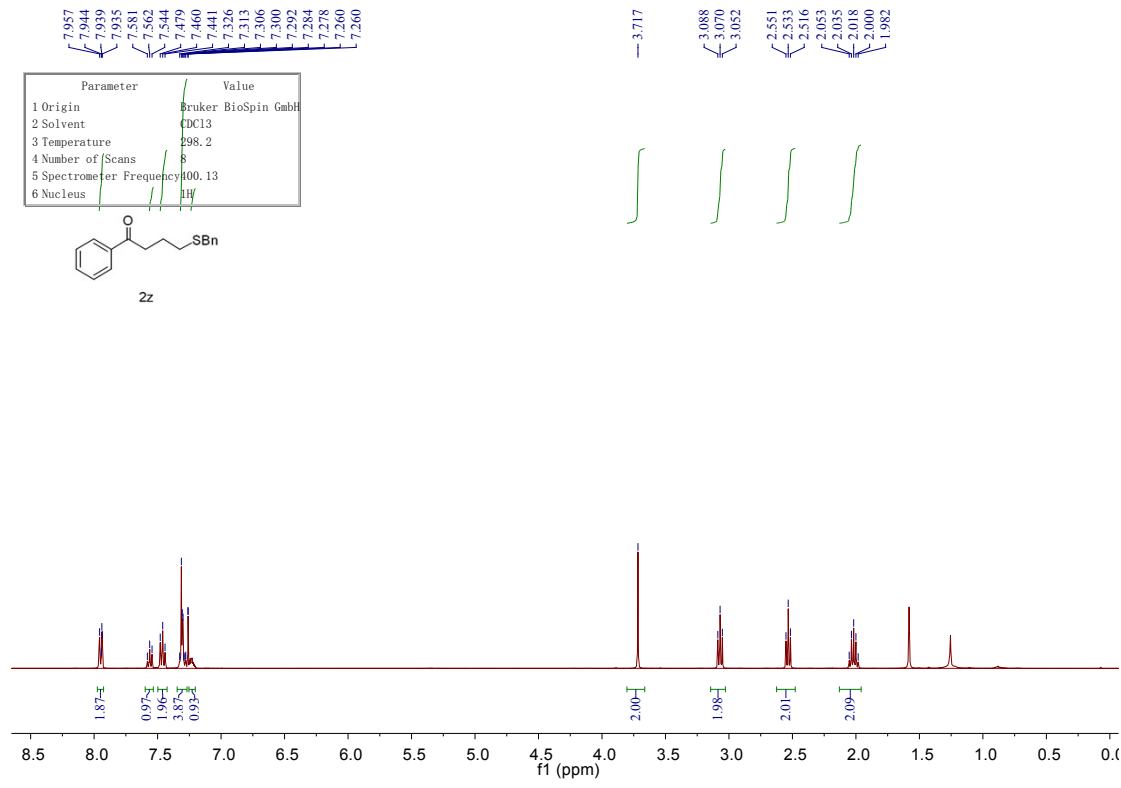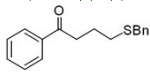

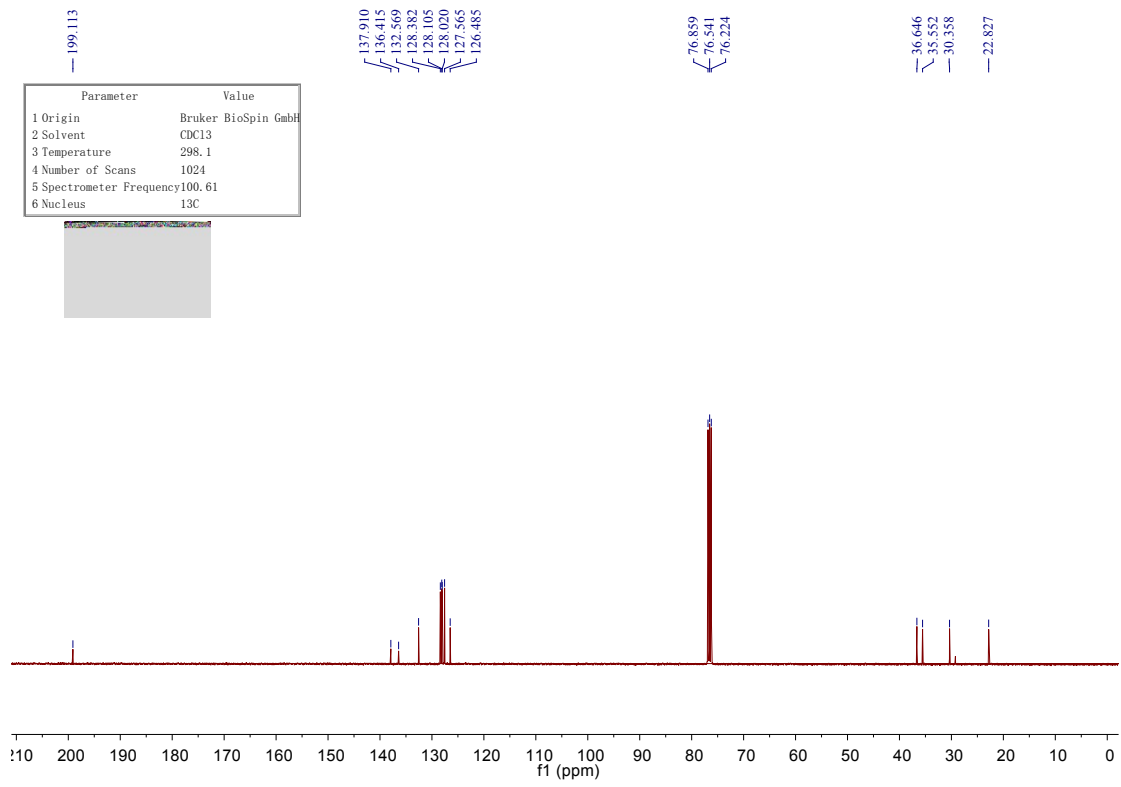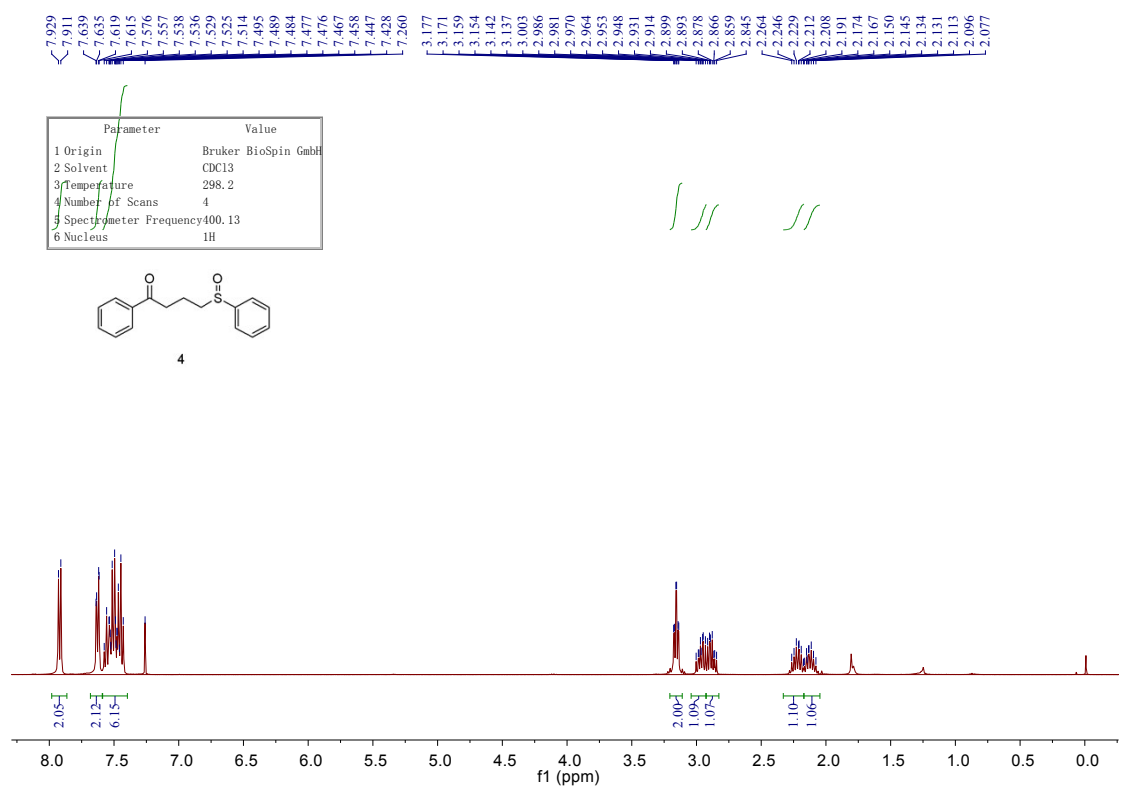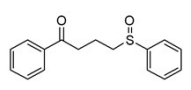

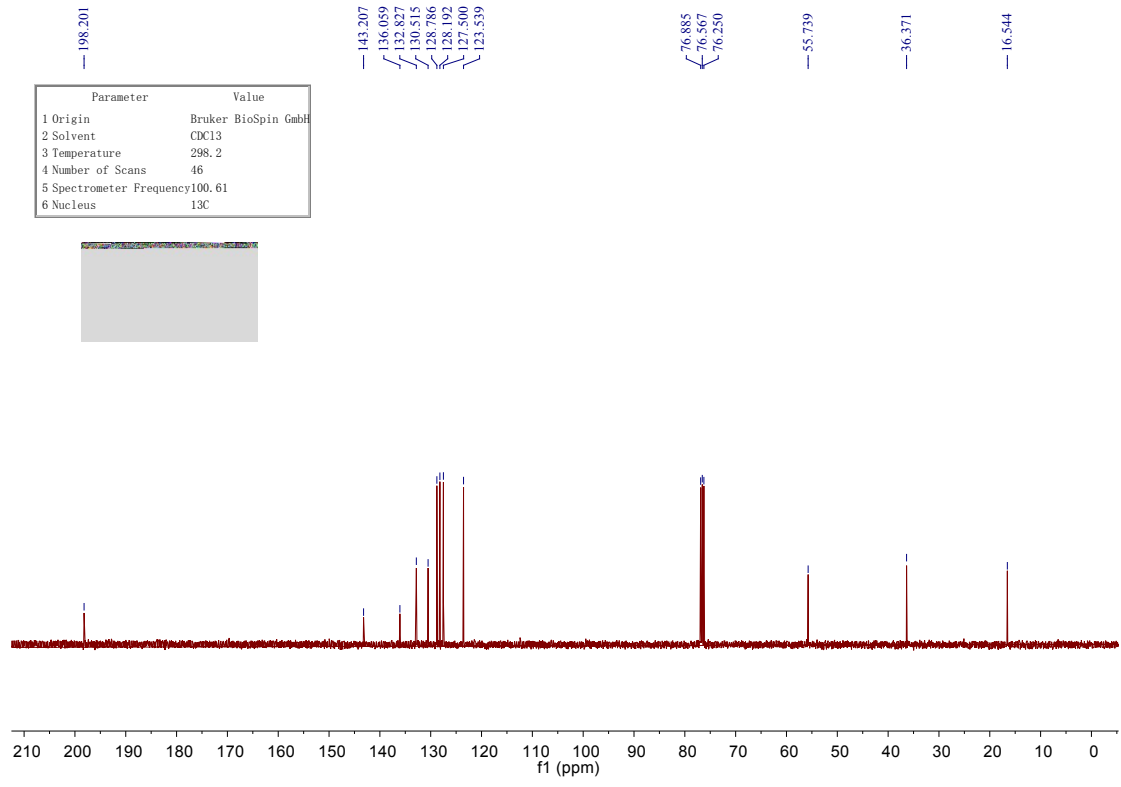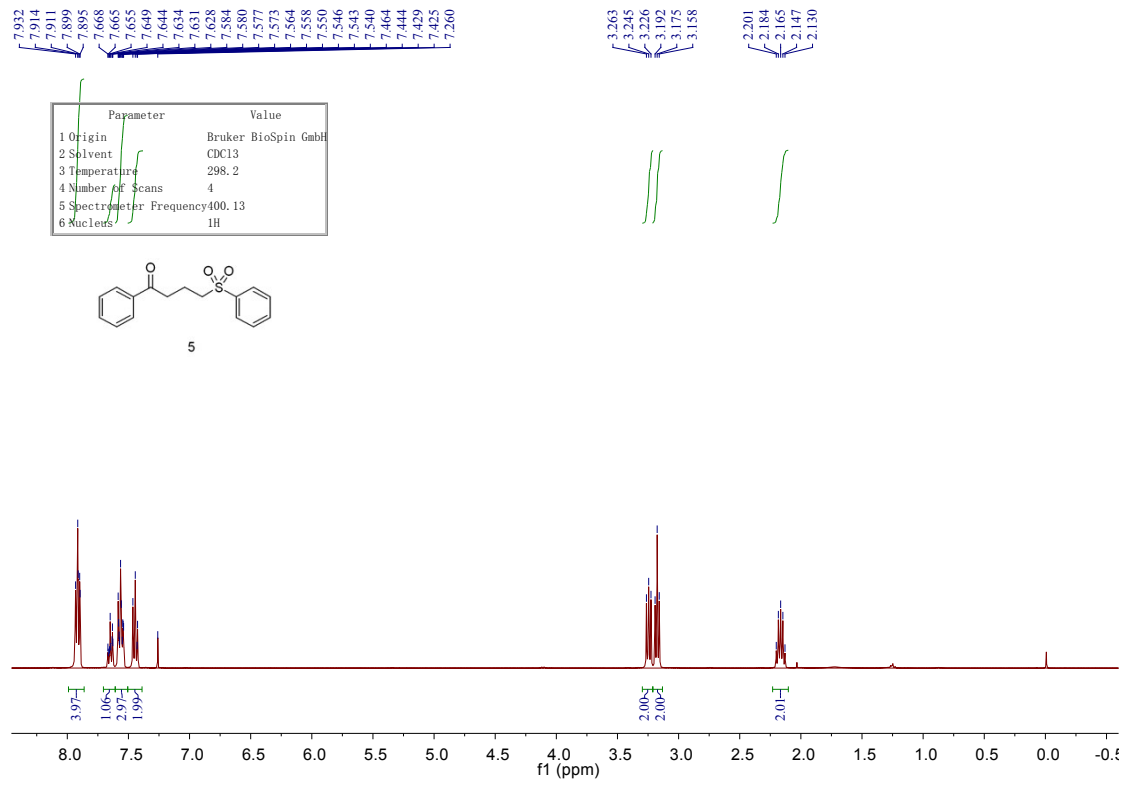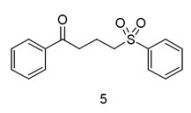

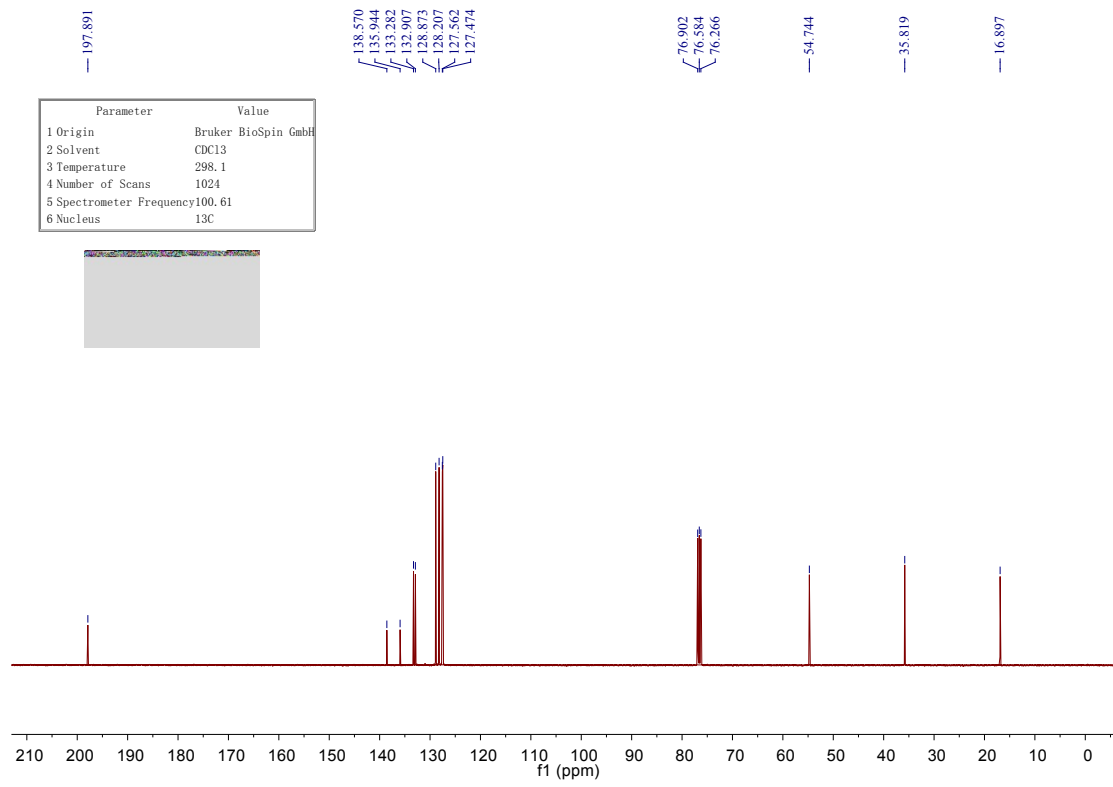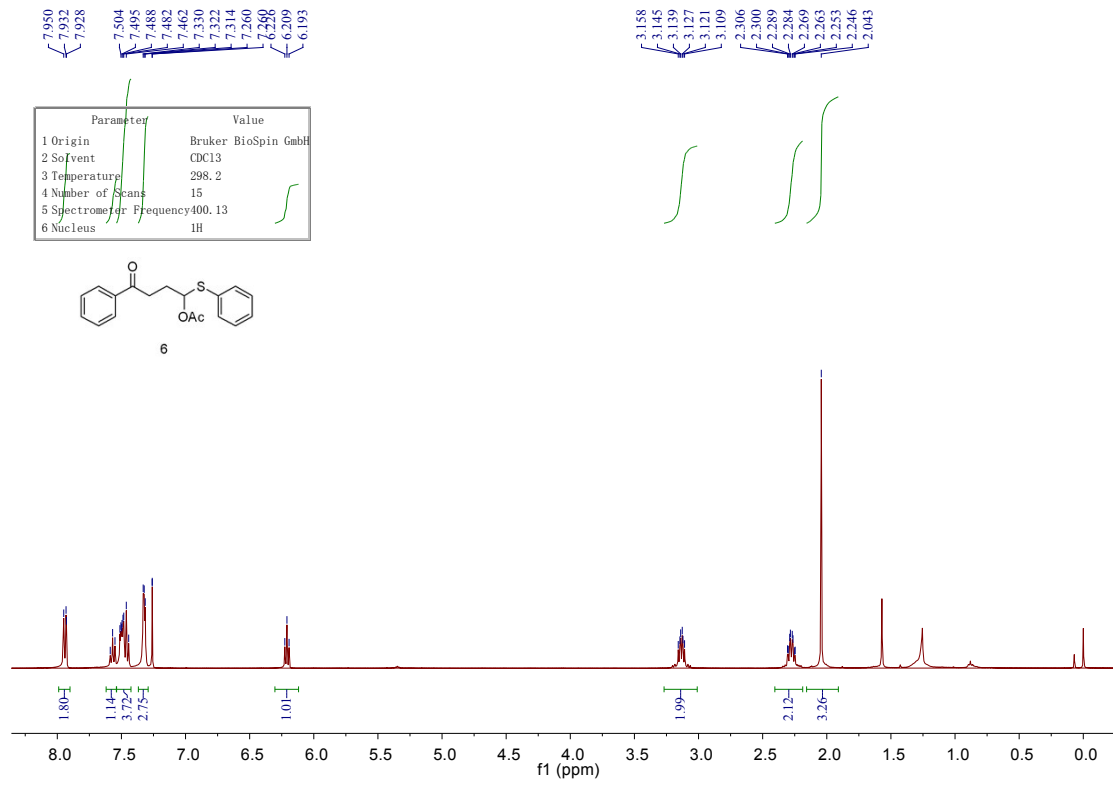

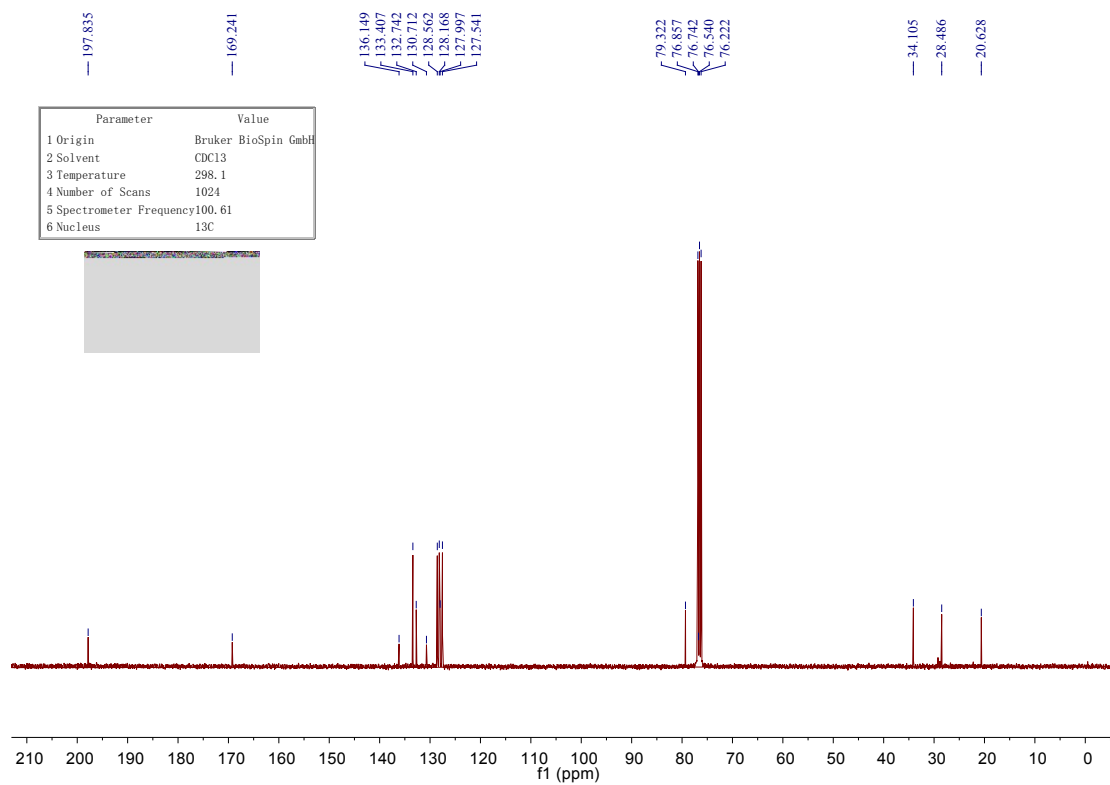

Supplement: c6cc01843b1.pdf [file c6cc01843b1.pdf]
